# Supplementary material for: CD40 is a major regulator of dendrite growth from developing excitatory and inhibitory neurons
Source: eLife. 2017 Nov 7;6:e30442. doi: 10.7554/eLife.30442 (PMC5687868; doi:10.7554/eLife.30442)
Supplement: Figure 1—source data 1. [file elife-30442-fig1-data1.xlsx]

## Sheet: CA1 apical
WT8 5.1	WT8 5.1	WT8 5.1	WT8 5.2	WT8 5.2	WT8 5.2	WT8 5.2	WT8 5.3	WT8 5.3	WT8 5.3	WT8 5.3	WT8 5.4	WT8 5.4	WT8 5.4	WT8 6.1	WT8 6.1	WT8 6.1	WT8 6.1	WT8 6.3	WT8 6.3	WT8 6.3	WT8 6.3	WT8 7.2	WT8 7.2	WT8 7.2	WT8 7.2		WT4 1.3	WT4 1.3	WT4 1.3	WT4 1.3	WT4 1.3	WT4 1.4	WT4 1.4	WT4 1.4	WT4 1.4	WT4 2.1	WT4 2.1	WT4 2.1	WT4 2.2	WT4 2.2	WT4 2.4	WT4 2.4	WT4 2.4	WT4 2.4	WT4 3.2	WT4 3.2	WT4 3.2	WT4 3.2	WT4 3.2
259.236	117.188	142.057	193.683	340.938	435.249	89.8618	184.153	360.623	223.656	247.914	314.172	405.263	429.552	74.146	241.439	296.247	118.251	351.784	355.901	224.389	171.493	97.6841	194.791	230.684	331.79		431.011	132.262	452.542	432.487	328.955	389.524	386.43	245.745	271.02	356.501	282.951	365.111	366.278	377.574	263.332	299.741	212.759	404.569	320.336	245.253	323.789	452.51	311.889
42.7371	188.593	295.227	57.7013	72.5648	123.134	197.192	106.643	126.358	104.272	159.283	251.475	202.16	169.062	257.661	62.0822	225.098	167.112	293.515	164.134	85.6298	43.6283	118.189	129.822	151.775	214.606		27.7407	290.706	91.6214	95.4253	119.838	20.3008	84.4568	187.831	252.978	74.5285	75.6237	119.871	30.8062	56.5443	103.154	33.4893	224.019	54.5645	106.939	81.5469	108.228	111.375	191.716
300.582	48.2133	78.4396	306.324	68.5597	343.683	97.5674	40.2486	53.1646	210.523	237.227	194.26	137.064	245.895	233.928	212.047	155.793	140.884	75.3969	80.6396	34.1309	226.035	30.5955	116.763	34.0141	44.7624		140.087	27.7473	34.0691	74.8037	184.59	33.8262	146.007	70.5395	33.7711	60.073	79.3175	49.2146	80.8892	84.9104	115.632	41.564	40.2258	144.491	23.6093	40.4593	42.5169	153.351	65.6887
51.8198	234.288	242.353	41.9076	268.95	42.5264	272.026	69.7583	240.264	183.213	54.5346	99.5082	329.578	260.134	179.371	81.0287	252.356	93.9058	40.6795	115.522	199.408	29.7432	156.82	59.0717	132.612	254.193		85.905	30.8385	45.9906	57.9765	51.8654	20.5666	102.956	45.3423	44.9893	59.6972	111.446	88.1733	179.506	108.98	26.934	177.932	20.2458	107.855	39.2863	58.9844	60.0569	214.603	32.6142
129.469	210.867	70.3193	325.287	72.1434	53.5794	191.661	137.676	70.8925	43.8001	87.1076	181.713	95.134	95.7755	62.5681	126.698	170.589	53.5955	187.5	276.342	28.6091	54.3766	48.5179	120.402	112.949	123.322			23.3436	130.8	29.3902	45.4591	17.5466	22.5853	44.5907	151.046	33.7645	245.914		86.5761	57.9993	22.0994	94.9716	41.3761	60.3387	46.9852	77.3055	151.225	134.991	169.134
48.1582	57.1698	122.998	69.467	107.081	108.286	178.738	166.004	129.407	239.414	198.583	312.549	76.978	236.297	108.05	169.328		66.933	138.966	142.184	23.0389	54.8464	162.19	62.0044	93.5689	48.6508			28.3661	68.7409		23.3047	126.245	97.5902	34.8275	17.2809		31.9176		32.4652		53.3687	152.132	40.054	36.6972	50.5366		32.7309		25.9099
197.708	163.107	29.0627	35.2422	156.853	59.1562	33.2007	11.7107	20.5666	83.5353	200.375		408.781	225.393	23.4926			127.132	102.425	175.343	177.4	35.3912	29.5392	118.555	41.117	139.919				80.6623			66.988	56.3336				43.894		78.7765		77.3766		176.282	51.7714	45.5691		27.3098		23.3275
34.9993	46.82	92.3797	20.6444	31.276	70.0308	28.3661	101.332	146.633	125.12	145.46				267.7			223.854	228.377	100.393	96.1608	99.9619	97.0748	68.7798	30.2747	47.4388				64.4284			104.178	48.5018						18.7747		51.4117		18.658	47.6173	41.509		96.6373		47.4777
169.695	132.178	157.945	122.359	38.1132	125.7	208.504	49.8561	111.015	149.044					264.533			130.331	58.6247	229.985	52.3741	128.876	182.021	44.5679	103.75	79.0907				83.6206				37.8863						91.1449		53.3203		40.6956	24.6106			39.9117		29.6331
40.6862	97.4117	189.808	108.419	26.0978	37.0179	317.815		36.775	117.508					33.9752			84.191	274.193	234.531	87.5546	142.2	75.9445	124.258		131.623				43.933										40.5694		75.3029		84.1199	17.6795
182.721	94.2266	70.8441	92.8039	53.8223				179.124	67.0041					16.1856			116.647	357.055	106.109	31.127	107.136	25.1354			160.803																		116.523	81.8193
124.916	38.2233	29.553	117.266	256.267				129.579	71.0092					15.8648			85.9117	51.2238	94.126		83.4166	177.572																					19.5264	37.4716
107.924	89.0001	65.6659		57.6946				62.3641						75.562			66.9719	262.547			234.894	115.966
	33.6772	68.8416		123.789										44.5356				49.1984			34.6396	26.9501
	86.615	272.625																			95.2279	10.7645
		107.525
		71.22
		78.2678
1690.65	1637.58	2185.13	1491.1	1674.15	1398.36	1614.93	867.382	1666.76	1618.1	1330.48	1353.68	1654.96	1662.11	1657.57	892.624	1100.08	1475.72	2471.49	2075.21	1039.82	1541.86	1354.97	1039.02	930.745	1576.2		684.743	533.264	1096.41	690.083	754.013	779.175	982.747	628.876	771.086	584.564	871.064	622.37	1005.79	686.008	841.931	799.829	1034.49	1069.49	674.77	503.549	882.406	1066.83	897.39
			1055.2
			49.4789
			74
KO1 3	KO1 3	KO1 3a	KO1 3a	KO1 4.1	KO1 4.1	KO1 4.1	KO1 4.1	KO1 4.2	KO1 4.2	KO1 4.3	KO1 4.3	KO1 4.4	KO1 4.4	KO1 4.4	KO1 4.4	KO1 5.2	KO1 5.2	KO1 5.2	KO1 5.2	KO1 5.2							KO3 3.1	KO3 3.1	KO3 3.1	KO3 3.1	KO3 3.1	KO3 3.1	KO3 3.1	KO3 3.1	KO3 3.1	KO3 3.2	KO3 3.2	KO3 3.2	KO3 3.2	KO3 3.3	KO3 3.3	KO3 3.3	KO3 3.4	KO3 3.4	KO3 3.4	KO3 3.4	KO3 3.4	KO3 4.1	KO3 4.2
211.673	264.368	272.051	210.715	145.726	249.184	169.565	370.86	212.678	276.199	316.065	232.12	200.675	140.541	251.766	153.94	293.826	226.631	246.913	293.8	248.682							159.244	168.496	365.947	173.145	276.419	213.067	204.12	220.96	217.406	207.049	330.556	347.357	267.887	324.86	270.279	458.308	294.309	321.652	434.649	305.219	416.837	281.642	277.958
102.512	43.2847	105.821	242.052	81.9227	87.9854	57.5617	46.616	147.534	158.47	76.9296	58.5536	38.4729	88.0633	250.415	130.447	22.9288	141.276	187.477	100.477	123.503							31.331	37.7924	58.3523	33.8262	25.2683	40.7412	85.348	141.26	30.0318	49.3474	26.2535	77.8759	109.287	147.002	80.8019	92.5932	75.0533	251.899	121.841	46.4603	60.893	155.23	145.554
139.07		108.377	238.429	45.1544	24.5878	71.6736	40.9063	56.6544	29.766	91.1449	166.269	70.1475	24.8536	42.0633	223.579	170.605	137.216	62.4903		185.633							42.1116	29.2345	65.2673	168.574	136.299	55.4491	53.5794	52.9767	29.5164	324.626	42.4713	22.7798	45.3879	136.228	29.8211	46.9301	38.5051	27.8413	24.5878	27.9675	109.984	15.0353	46.2335
		163.22	215.997	161.717	60.0891	25.8548	125.411	44.5356	77.0786	43.6122		90.4645		22.0604	52.2184	40.2258	123.361	62.6137									25.2683	21.9276	56.6383	80.6396		22.7181	52.1795	21.5289		25.2683	22.757	49.3313	25.871		24.0952	18.1882	25.8387	220.176	20.5277	202.277	73.7929	48.6508	31.4867
			139.747	34.053	123.28	36.4086	88.3746	87.0392		58.0932		44.7235				187.7												20.8712	63.2164	18.0003		45.0604		27.6695		39.6232	22.8899				20.9813	24.8536			56.7873	32.582	140.93	58.6247
					42.3774	46.2107	120.638	68.8644																				22.702	43.6672	32.6531		10.7645				34.4127	21.4578				38.1132	22.0054			33.8651			13.3146
					29.0855	24.2509	69.8979	70.977																				37.6595								71.9877	32.8249											23.7972
					48.1649	32.6759	12.1805																														114.262											41.4217
					18.7747		16.9212
					15.2783		30.2197
							40.3265
							17.054
							32.2934
453.255	307.653	649.469	1046.94	468.572	698.807	464.201	1011.7	688.282	541.513	585.845	456.943	444.484	253.458	566.305	560.184	715.284	628.484	559.494	394.277	557.818							257.955	338.683	653.088	506.839	437.986	387.8	395.227	464.395	276.954	752.315	613.472	497.344	448.434	608.09	464.092	662.879	433.706	821.569	692.258	614.506	802.437	637.716	501.232
			546.133
			20.5531
			67
[truncated: 25 more columns]

## Sheet: CA1 basal
WT8 5.1	WT8 5.1	WT8 5.2	WT8 5.2	WT8 5.3	WT8 5.3	WT8 5.4	WT8 5.4	WT8 6.2	WT8 6.3	WT8 6.3	WT8 6.3	WT8 6.3	WT8 6.4	WT8 7.2	WT8 7.2	WT8 7.2				WT4 1.3	WT4 1.3	WT4 1.3	WT4 1.4	WT4 1.4	WT4 1.4	WT4 1.4	WT4 2.1	WT4 2.1	WT4 2.2	WT4 2.4	WT4 2.4	WT4 2.4	WT4 3.2	WT4 3.2	WT4 3.2	WT4 3.3		WT 5
133.992	45.4752	18.0942	88.9478	88.329	39.7399	75.711	53.3526	78.9873	101.371	36.2985	80.9286	108.089	74.9204	81.1549	63.3198	82.4703				50.8802	55.2612	72.1501	76.7351	40.5855	26.4025	135.479	60.8541	48.0482	29.0305	38.3628	22.4752	27.4977	30.5177	18.7908	52.5459	72.2535		52.5459	50.8802	22.4752	18.7908	40.5855	30.5177	48.0482	29.0305	26.4025	135.479	27.4977	72.1501
87.4834	28.7097	9.8021	27.083	66.1035	29.6882	70.2737	60.4716	40.2647	91.8254	101.073	30.8223	71.1488	81.8515	58.0932	38.7709	102.982				63.2714	132.771	43.2525	10.7094	19.1895	73.1608	20.2297	29.5942	37.0341	77.9243	60.8474	15.1293	21.7396	31.127	36.1885	787.118	16.0527		787.118	63.2714	15.1293	36.1885	19.1895	31.127	37.0341	77.9243	73.1608	20.2297	21.7396	43.2525
75.319	82.0005	19.0955	65.4002	45.757	65.1733	20.6216	29.766	20.1129	50.1058	66.3464	18.1103	61.34	59.4153	80.763	80.967	49.0333				14.5038	17.4299	31.9726	35.5469	38.9265	35.0543	20.8712	41.5318	16.4514	20.6444	71.0092	70.828	21.6457	49.5581	24.7207	52.86	66.6672		52.86	14.5038	70.828	24.7207	38.9265	49.5581	16.4514	20.6444	35.0543	20.8712	21.6457	31.9726
71.126	56.2074	95.0011	82.124	48.4468	14.4488	20.3397	21.4739	108.371	79.9335	48.5018	64.3667	76.0707	41.6418	19.4324	68.4429	57.3349				90.604	58.2261	68.8093	29.0077	72.542	107.081	75.9767	29.1016	50.848	79.496	49.691	70.7824	68.8644	38.6447	10.7094	47.8536	35.9388		47.8536	90.604	70.7824	10.7094	72.542	38.6447	50.848	79.496	107.081	75.9767	68.8644	68.8093
75.711	50.0668	23.5865	52.4291	79.4409	59.8689	23.0617	10.5376	61.544	21.9826	102.558	48.2589	127.1	41.5318	38.9037	10.6155	41.1331				83.3293	29.711	38.285	12.2583	53.5082	33.3886	39.5292	8.0264	40.2258	19.2995	41.7747	25.1582	29.3513	46.8751	31.5968	32.1055	39.6621		32.1055	83.3293	25.1582	31.5968	53.5082	46.8751	40.2258	19.2995	33.3886	39.5292	29.3513	38.285
49.5971	69.5999	23.7583	50.8413	32.4813	130.363	84.5185	72.1595	48.4401	60.5494	82.3119	29.1634	87.0848	84.8231	93.6562	98.1928	14.9575				119.745	20.6605	21.3799	33.0907	49.9568	71.0548	51.0359	22.9839	27.8963	21.4189	14.8085	64.6808	23.1329	24.6657	44.5356	33.904	46.4053		33.904	119.745	64.6808	44.5356	49.9568	24.6657	27.8963	21.4189	71.0548	51.0359	23.1329	21.3799
86.4982	36.8623	29.2345	18.4311	25.777	115.856	23.9852	39.85	73.5822	50.2386	126.238	115.522	91.4141	100.088	25.871	26.989	73.5044				66.2753	52.562	10.5766	55.3712	41.7586	38.2622	35.0315	26.5515	14.371	14.6756	40.5077	53.2586	24.9475	22.2873	29.6882	11.8597	126.138		11.8597	66.2753	53.2586	29.6882	41.7586	22.2873	14.371	14.6756	38.2622	35.0315	24.9475	10.5766
67.3799	36.1267	30.4465	106.605	21.9276	40.5694	25.2522	22.647	51.7647	74.0359	80.4194	27.193	47.5167	48.5407	53.1969	14.9186	101.776				36.1106	101.128	64.3667	55.5658	49.785	47.3126	13.3146	13.2207	57.0369	35.2972	8.8397	16.5453	63.5077	42.2834	14.7307	37.4877	33.6705		37.4877	36.1106	16.5453	14.7307	49.785	42.2834	57.0369	35.2972	47.3126	13.3146	63.5077	64.3667
43.9652	22.2645	18.7908	51.1232	36.2435	126.037	56.9268	36.0167	121.39	32.5592	57.967	61.7225	100.069	62.4514	60.5884	79.253	48.7448				32.9189	53.0156	25.0026	35.6019	87.7264	28.5768	21.8725	73.605	33.8651	26.934	27.138	13.4086	34.9214	52.2962	51.3178	157.31	48.4079		157.31	32.9189	13.4086	51.3178	87.7264	52.2962	33.8651	26.934	28.5768	21.8725	34.9214	25.0026
43.4015	32.1833	56.2558	108.286	44.043	75.5136	15.1293	65.2189	47.6723	28.9754	37.5817	108.63	104.444	18.5479	45.3651	47.8052	141.924				90.7141	83.5105	11.1242	52.617	110.772	104.278	41.9465	46.2335	28.5151	37.6595	16.6004	46.2724	8.9337	28.9527	17.9224	31.182	46.0228		31.182	90.7141	46.2724	17.9224	110.772	28.9527	28.5151	37.6595	104.278	41.9465	8.9337	11.1242
18.8848	110.13	54.3928	38.2461	92.467	76.1096	71.573	33.5054	86.8741	89.5115	53.3364	67.9409	132.434	31.4639	68.7248	31.2371	74.1849				24.1731	18.9237	130.285	105.15	26.1206	59.6421	64.7975	14.5817	22.2094	46.859	49.4319	44.49	40.5077	55.1833	35.6342	57.0141	38.489		57.0141	24.1731	44.49	35.6342	26.1206	55.1833	22.2094	46.859	59.6421	64.7975	40.5077	130.285
133.053	76.6572	26.0038	19.5264	46.2885	61.6836	70.4388	55.6987	52.8211	27.2158	58.7737	86.2486	36.7133	24.1731	46.6872	33.6155	47.1408					99.272	46.8134	63.7023	38.3239	36.8689	80.4355	34.296	56.7483	26.895	23.9073	44.1531	64.7264	32.8638	68.6698	45.4591	73.1352		45.4591		44.1531	68.6698	38.3239	32.8638	56.7483	26.895	36.8689	80.4355	64.7264	46.8134
145.375	55.2222	105.312	22.0604	17.148	54.4089	99.0612	17.148	49.895	63.148	99.7901	98.3807	27.0991	45.9678	16.5614	55.5269	34.5617					28.405	9.1216	25.2911		43.0418	30.4854	92.82	21.0981	16.6004	56.998	36.9951	26.2307			49.5192	45.6081		49.5192		36.9951				21.0981	16.6004	43.0418	30.4854	26.2307	9.1216
	65.9317	15.544		32.1605	68.1544	36.6744	90.7786	38.8326	49.84	47.2898		45.5141	29.6721	48.9716	9.935	66.1813					35.8126	15.8648	26.934		18.4701	34.6557	19.6982	30.9941		27.8185		85.105			20.6055	60.744		20.6055						30.9941		18.4701	34.6557	85.105	15.8648
	28.8587	91.1127		43.2297	24.7824	157.897	82.383	153.71	68.4819	50.3715		27.1769	24.7435	31.9565	52.0627	31.9176						61.8098	39.9439			64.9371	46.2724	42.0405		44.6068		27.6695			21.5289	30.1029		21.5289						42.0405			64.9371	27.6695	61.8098
	80.3577	95.3474		48.6897		153.406	22.1155	72.487	70.0764	177.799		60.2998	25.3461		28.648	63.2647						37.1669	58.0999			57.3805	28.8198	41.3439		27.8963		50.044			49.5259	62.3963		49.5259						41.3439			57.3805	50.044	37.1669
	62.9117	104.492		31.6907		93.0536	20.6605	57.0919		102.168		90.3705	52.9539		63.2714	54.9726						34.6557	23.5315			113.011	109.638	67.043		25.5891		43.2135												67.043			113.011	43.2135	34.6557
	35.6959	26.3474				93.0536	114.268	25.6831		86.0513		154.057	52.5781		56.0356	12.712						86.8096					83.5105	91.4819		37.0958		46.1785												91.4819				46.1785	86.8096
	90.0108	44.4578				150.965	64.9304	134.757		37.3159		38.3172	64.8042		13.4475	33.6772						24.212					23.7972	57.6396		18.8459		92.0684												57.6396				92.0684	24.212
	53.4304	20.0028				44.4739	32.3874	52.4291		73.6373		42.8377	107.603		20.4176							82.924					69.7261	40.5305		21.0202		21.9276												40.5305				21.9276	82.924
		23.7972				54.8142	104.317			76.6022		78.5108	78.7148		19.87							14.4649								61.434																			14.4649
						58.5536	77.2988			117.902		29.915	79.998									65.6659								85.4258																			65.6659
							76.1552			77.986		48.0643	62.7722									14.5817								41.0164																			14.5817
							33.1296			55.7471		52.2184	57.1242									57.6073																											57.6073
										43.8551		27.4588	47.7663									14.9964																											14.9964
										48.8776		76.5861
1031.79	1118.7	930.875	731.103	800.224	982.397	1499.78	1236.27	1376.71	959.851	1946.8	837.288	1841.85	1399.49	769.926	913.342	1132.47				672.525	786.689	1083.9	739.156	629.195	722.595	900.99	874.862	825.421	452.734	890.665	524.177	822.213	455.255	384.505	1487.88	841.694		1487.88	672.525	524.177	384.505	629.195	455.255	825.421	452.734	722.595	900.99	822.213	1083.9
			896.035
			48.1508
			51
KO1 3	KO1 3	KO1 3	KO1 3a	KO1 3a	KO1 4.1	KO1 4.1	KO1 4.1	KO1 4.1	KO1 4.1	KO1 4.2	KO1 4.2	KO1 4.3	KO1 4.4	KO1 4.4	KO1 5.2	KO1 5.2	KO1 5.2	KO1 5.2		KO3 3.1	KO3 3.1	KO3 3.1	KO3 3.1	KO3 3.1	KO3 3.1	KO3 3.1	KO3 3.2	KO3 3.2	KO3 3.2	KO3 3.2	KO3 3.3	KO3 3.3	KO3 3.4	KO3 3.4				KO 2
33.7711	45.8966	80.3416	25.9377	60.2837	56.0195	55.0732	59.1106	34.4516	31.4478	29.2184	55.284	51.9527	89.8551	34.2409	63.4593	54.033	26.3474	20.8712		26.8172	46.2174	45.8738	81.0287	45.553	27.3487	45.0832	73.3165	72.4709	71.0482	48.479	64.1398	70.1864	43.8001	55.1444				81.0287	26.8172	64.1398	55.1444	45.553	43.8001	72.4709	71.0482	27.3487	45.0832	70.1864	45.8738
38.2071	13.9951	30.4237	10.8584	72.6682	44.1142	64.2499	77.1726	44.2148	65.572	23.7583	42.3841	19.2834	46.4375	40.3587	33.6772	40.7345	19.6592	31.9887		73.3165	27.1769	48.5569	20.1907	66.7773	37.9414	22.2483	46.8912	28.6869	39.5131	51.3889	34.5845	60.5105	39.85	87.7586				20.1907	73.3165	34.5845	87.7586	66.7773	39.85	28.6869	39.5131	37.9414	22.2483	60.5105	48.5569
37.4327	60.0958	46.0456	53.1029	35.6959	49.1434	24.157	46.3113	40.8285	35.2033	16.0917	125.956	10.5376	51.9204	14.222	93.2481	25.5891	28.1943	24.8374		71.3756	42.9089	29.3902	71.9394	79.849	46.7194	30.6505	54.182	50.9514	48.1744	30.3136	58.061	44.8336	38.1682	28.7647				71.9394	71.3756	58.061	28.7647	79.849	38.1682	50.9514	48.1744	46.7194	30.6505	44.8336	29.3902
75.8828	28.2171	19.776	60.1414	36.2985	49.2535	46.4053	14.9575	22.0604	83.7763	11.3121	22.2483	16.6393	49.2146	28.554	84.7158	46.6872	15.8259	37.4716		54.033	31.6746	27.8963	25.9877	39.0044	45.7637	39.2635	21.3249	12.8221	37.6206	16.6782	49.3541	88.6498	26.4414	55.1511				25.9877	54.033	49.3541	55.1511	39.0044	26.4414	12.8221	37.6206	45.7637	39.2635	88.6498	27.8963
26.3863	20.8323	16.5614	26.6454	68.4107	82.7978	34.4678	16.999	79.6677	35.4852	45.5369	48.0871	67.6913	45.3262	17.9614	78.9578	39.9212	33.4276	21.9437		15.2783	16.3346	56.3014	89.2753	67.1987	29.5164	56.6933	45.4268	113.309	36.4864	31.5579	22.6242	80.6785	25.0415	42.2834				89.2753	15.2783	22.6242	42.2834	67.1987	25.0415	113.309	36.4864	29.5164	56.6933	80.6785	56.3014
18.2821	30.1808	34.1081	39.8272	32.2934	80.8569	48.479	12.767	19.4163	40.0379	12.1255	30.009	28.2722	45.4363	29.2734	39.4352	29.8989	33.4114			40.6862	23.8523	52.915	49.8239	17.2809	13.9562	53.5405	62.7722	32.8638	24.3059	36.6354	112.784	45.1383	44.1598	96.8157				49.8239	40.6862	112.784	96.8157	17.2809	44.1598	32.8638	24.3059	13.9562	53.5405	45.1383	52.915
27.5755	17.148	51.6385	18.4701	29.0855	91.1905	42.1505	35.0704	46.7194	22.757	48.7609	39.8272	36.5415	23.6805	48.8226	48.1649		12.2194			61.9977	54.4156	34.7107	98.6787	35.9549	14.9575	49.785	67.8725	36.4314	30.2908	29.3124	24.5878	25.0804	50.7701	26.3636				98.6787	61.9977	24.5878	26.3636	35.9549	50.7701	36.4314	30.2908	14.9575	49.785	25.0804	34.7107
24.1731	16.8661	17.0151	34.7101	59.1562	45.8899	37.7307	27.0668	26.7071	27.6145	82.9629	25.2683	56.0034	14.5038	43.1907	18.3372						36.1267	79.8101	43.4954		32.2222	50.0118	22.6631	35.2972	24.6106	13.0328	18.2043	46.4831	46.0228	58.7576				43.4954		18.2043	58.7576		46.0228	35.2972	24.6106	32.2222	50.0118	46.4831	79.8101
19.6042	12.2583	30.7284	13.1267	48.6669	66.1035	30.5177	31.425	22.8121	10.5376	50.1769		52.7271		15.1454							33.0907	29.711	21.286		62.7466	40.1157	21.0981	31.6518	37.0179	19.2995	22.0604	84.807		27.6306				21.286		22.0604	27.6306			31.6518	37.0179	62.7466	40.1157	84.807	29.711
	35.3912	64.3989	66.0256				26.989	47.4777		13.9562		33.2396		44.0592							25.9877		31.0492		32.637	41.6646	34.5456		21.4739		72.9178	13.9562		25.2133				31.0492		72.9178	25.2133				21.4739	32.637	41.6646	13.9562
	15.1293	37.2059	33.9363					45.9906		36.0945		20.8874									19.831		35.2033		51.2722	57.2409	52.4841		25.7609		26.7783	34.1081		62.8567				35.2033		26.7783	62.8567				25.7609	51.2722	57.2409	34.1081
	25.8548	16.7332	10.0289					19.7371		44.2699											36.9012				19.4713	54.3766	37.6367				19.776	51.8587								19.776						19.4713	54.3766	51.8587
	46.2563	26.5353								44.3477											21.9048				37.4166	85.4191	24.7207				19.776	68.6698								19.776						37.4166	85.4191	68.6698
	29.3513	14.4649								19.8472															63.4043	56.6449																				63.4043	56.6449
																									26.7622																					26.7622
301.315	397.473	485.977	392.811	442.559	565.369	383.231	347.869	450.083	352.432	478.459	389.064	393.775	366.374	315.828	459.995	236.864	169.085	137.113		343.505	416.422	405.165	567.958	351.618	542.136	682.738	564.934	414.484	396.303	276.698	545.648	714.96	314.254	566.74				567.958	343.505	545.648	566.74	351.618	314.254	414.484	396.303	542.136	682.738	714.96	405.165
			434.139
			18.7734
			49
[truncated: 5 more columns]

## Sheet: CA1 projections
WT																								5.24806	0.0730149	85
5	6	5	5	5		5	5	5	4	4		7	5	6	6	4	5
4	5	6	6	5			5	6	5	4		6	5	6	6	5	6
4	5	5	7	5			5	6	5	6		6	6	5	5	6
6	5	6		4				5	5	4		7	5	6	5	6											0.818596
6	5	5		4				5	5	7		6	6	5	4	6											0.710068
	4	5		5					5	5		6	5		6	4
										4		4	6		5
										6		5			5
5	5	5.33333	6	4.66667		5	5	5.4	4.83333	5		5.875	5.42857	5.6	5.25	5.16667	5.5
KO																								5.21667	0.1011	60
6	5	6	6	6		5	6	5				6	5	5
4	5	5	4	4		6	5	6				6	6	5
5	4	6	4	4		4		5				6	7	4
5		4	6	6		6		6				5	6	5
5			5			5		6				5	4	6
5			5					4				5	6	4
								6				6		5
								5						5
														6
5	4.66667	5.25	5	5		5.2	5.5	5.375				5.57143	5.66667	5

## Sheet: scholl CA1 apical
	10	20	30	40	50	60	70	80	90	100	110	120	130	140	150	160	170	180	190	200	210	220	230	240	250	260	270	280	290	300	310	320	330	340	350	360	370	380	390	400	410	420	430	440	450	460	470	480	490
	WT
WT 8		1	2	2	2	2	4	4	6	6	6	7	7	7	7	6	7	7	7	7	7	3	4	4	3	4	6	4	3	3	2	1	1	1	1	1	1	1
		1	1	1	1	1	2	2	3	4	5	4	4	3	2	5	5	7	7	7	7	10	8	6	7	7	7	5	3	2	2	1	1
		1	1	1	2	3	3	4	4	5	6	6	5	4	5	5	5	6	5	7	8	8	7	7	6	6	8	10	9	11	10	8	6	3	2
			1	1	1	1	1	1	2	2	4	4	5	5	5	5	6	6	5	6	5	4	5	4	4	3	4	4	3	4	3	4	5	4	4	4	1	1
		1	1	1	1	1	1	1	1	3	5	4	5	4	4	4	4	5	4	5	5	5	4	5	6	7	7	7	7	6	5	4	4	2	2	2	2	2	1	1	1	1	1
		1	1	1	1	1	1	2	2	3	3	3	3	3	3	2	2	2	2	3	3	2	2	2	2	2	2	2	2	3	3	3	3	4	4	5	6	7	8	6	3	2	1	1
		1	1	1	3	4	4	6	6	5	5	4	4	4	3	4	5	5	5	5	5	6	6	5	3	3	4	4	4	4	4	3	2	2	2	2	1
		3	3	4	3	3	5	5	5	4	4	4	4	6	5	5	4	2	1	1	1	1	1
		1	1	1	1	2	2	2	3	3	3	3	3	3	3	3	6	6	7	6	5	5	6	6	5	5	5	5	4	5	4	6	5	4	5	3
		1	1	1	2	2	3	3	5	5	4	5	5	6	6	7	7	6	8	8	6	7	6	6	8	3	1	1	1
		1	2	2	2	2	2	2	2	2	3	3	4	5	5	4	4	4	5	5	5	4	5	5	5	5	5	5	5	3	3	1	1
			1	1	1	2	2	2	2	4	5	5	5	5	5	5	5	6	6	5	6	6	6	6	6	4	4	4	4	3	3	3	3	3	3	2	2	2	1	1	1	1	1
		1	1	1	1	1	1	2	3	3	3	4	4	4	5	5	5	5	5	5	5	5	4	6	6	6	6	6	6	6	5	5	4	3	2	2	2	2	2
		1	1	1	2	3	3	4	4	4	5	5	5	5	5	5	5	3	3	4	4	2	2
		1	1	1	1	3	2	2	3	4	4	5	5	5	4	4	4	4	5	4	3	3	4	3	2	2	2	2	1	1	1	1
		1	1	1	2	3	4	4	4	5	4	3	3	3	3	3	3	4	4	4	5	5	4	7	6	6	4	3	2	4	4	4	3	3	3	2
		2	2	3	5	5	6	6	9	10	7	9	8	8	7	7	7	7	6	6	6	6	6	6	7	8	8	8	6	7	6	5	4	4	2	1
		1	1	1	2	2	2	3	5	6	6	5	6	6	7	7	8	8	7	10	11	10	9	10	7	7	6	5	4	3	2	2	2	2
		1	1	1	1	1	1	2	2	2	3	3	3	3	5	6	5	6	6	6	6	6	6	1	1	1	1	1	1	2
	1	3	3	5	6	5	5	8	9	8	8	5	5	6	6	6	6	3	3	2	4	4	4	4	3	2	2
			2	4	5	6	6	7	8	8	8	9	7	7	6	7	7	6	4	2	1
	1	1	1	1	1	2	4	4	5	6	4	6	6	5	5	5	4	3	3	2	2	2
		1	1	1	1	1	1	1	2	3	4	5	5	6	5	6	6	5	5	5	4	4	3	2
		1	1	1	1	1	1	1	1	1	2	5	7	7	6	6	7	6	7	7	6	7	7	6	7	6	5	4	4	3	2	1	1	1
WT4		1	1	1	1	1	1	1	1	1	1	2	2	2	2	2	1	1	1	1	1	1	1	2	2	2	2	2	2	1	1	1	1	2	2	1	1	1	1
	1	1	2	2	4	3	2	3	3	2	3	3	1	1	1	1	1	1	1	1	1	1	1	1	1	1
	1	1	1	2	2	2	1	1	2	3	3	3	3	3	2	1	1	2	2	2	2	2	2	2	2	2	4	3	2	2	2	2	2	3	4	3	2	2	2	2	2	1
	1	1	2	3	4	4	2	1	1	1	1	1	1	1	1	1	2	2	2	2	2	2	2	2	2	1	1	1	1	1	1	1	1	1	1	1	1	1	1	1
	1	1	1	3	3	2	3	3	3	3	3	3	3	1	1	1	1	1	1
	1	1	1	2	4	3	1	1	1	1	1	1	1	1	1	1	1	1	1	1	1	1	1	2	3	3	3	3	3	2	2	2	2	2	1	1	1
	1	1	1	2	2	2	1	2	2	2	2	2	2	2	2	2	1	1	1	1	1	1	1	2	2	2	2	2	2	2	1	3	2	1	1	1
	1	2	2	5	4	4	4	5	5	3	1	1	1	1	1	2	2	2	2	2	2	2	2	2	2	2	2	2	2	2	2	2
	1	3	2	1	1	1	1	1	1	1	3	3	3	2	2	2	2	2	2	2	2	3	3	2	2	2	1	1
		1	1	1	1	2	1	2	2	2	2	2	2	3	3	3	3	4	4	3	5	4	4	2
	1	1	1	1	1	1	1	1	1	2	1	1	1	1	1	3	3	2	2	2	2	1	1	1	1	1	1	1	1	1	1	1
		2	2	2	2	2	2	1	1	1	1	1	2	2	2	2	2	4	4	5	5	5	5	5	3	3	2	1	1	1	1	1	1
	1	1	1	1	1	1	1	1	1	1	1	1	1	1	1	1	1	1	1	1	1	2	2	2	2	2	2	2	2	2	2	3	2	2	1	1	1	1	1
		1	1	1	1	2	2	2	2	2	2	2	2	2	1	2	3	2	2	2	2	1	1	2	2	10	2	3	2	2	2	2	2	3	2	2	2	3	1	1
		1	1	1	1	1	1	1	1	1	1	2	3	3	2	2	2	2	2	2	2	1	1	1	1	2	2	2	3	3	2	2	2
		1	1	1	2	3	3	4	3	3	2	2	1	2	3	4	4	5	3	2	3	3	3	2	3	2	3	2
	1	1	1	1	3	2	2	2	1	1	1	1	1	1	1	1	1	1	1	1	1	1	1	1	2	2	2	2	1	1	1	1	2	3	3	3	3	3	2	2	2	1	1	1	1	1	1
		1	1	3	3	3	3	2	1	2	2	2	2	3	3	3	3	3	2	2	3	4	4	4	4	3	2	2	1	2	1	1	1	1
		1	1	2	2	2	2	3	4	3	4	3	2	2	4	4	4	4	1	1	1	1	1	1	1	1	1	1	1	1	1	1	2	2	2	2	1
	1	1	1	3	4	2	2	2	1	1	1	1	1	4	3	3	3	2	2	2	2	2	2	1	1	1	1	1	1
		1	1	1	3	2	1	1	1	1	1	2	3	3	3	2	2	2	2	2	2	1	1	1
		1	1	2	2	2	3	3	2	2	1	1	2	2	2	2	2	2	2	2	2	2	4	4	4	3	3	3	2	2	2	2	1
		1	1	1	1	1	1	1	1	1	1	1	1	2	2	2	2	2	3	3	3	3	3	3	3	2	3	3	3	3	3	3	3	4	4	4	4	3	3	2	2	1
	1	1	3	3	3	1	1	1	1	1	2	2	1	1	1	2	2	2	2	2	2	2	4	3	3	3	3	3	4	3	3	3	3	3	2	1
		1	1	1	1	2	1	3	2	3	3	3	3	3	3	3	3	3	3	3	4	3	3	3	3	3	3	3	3	3	3	2	1	1	1	1	1	1	1	1
	1	1	1	2	2	2	1	1	2	3	3	3	3	3	2	1	1	2	2	2	2	2	2	2	2	2	4	3	2	2	2	2	2	3	4	3	2	2	2	2	2	1
	1	1	2	3	4	4	2	1	1	1	1	1	1	1	1	1	2	2	2	2	2	2	2	2	2	1	1	1	1	1	1	1	1	1	1	1	1	1	1	1
		1	1	1	1	2	2	2	2	2	2	2	2	2	1	2	3	2	2	2	2	1	1	2	2	10	2	3	2	2	2	2	2	3	2	2	2	3	1	1
	1	1	1	1	3	2	2	2	1	1	1	1	1	1	1	1	1	1	1	1	1	1	1	1	2	2	2	2	1	1	1	1	2	3	3	3	3	3	2	2	2	1	1	1	1	1	1
		1	1	2	2	2	2	3	4	3	4	3	2	2	4	4	4	4	1	1	1	1	1	1	1	1	1	1	1	1	1	1	2	2	2	2	1
		1	1	1	1	1	1	1	1	1	1	2	2	2	2	2	1	1	1	1	1	1	1	2	2	2	2	2	2	1	1	1	1	2	2	1	1	1	1
WT5		1	1	1	1	1	1	1	1	1	1	2	2	2	2	2	1	1	1	1	1	1	1	2	2	2	2	2	2	1	1	1	1	2	2	1	1	1	1
	1	1	2	2	4	3	2	3	3	2	3	3	1	1	1	1	1	1	1	1	1	1	1	1	1	1
	1	1	1	2	2	2	1	1	2	3	3	3	3	3	2	1	1	2	2	2	2	2	2	2	2	2	4	3	2	2	2	2	2	3	4	3	2	2	2	2	2	1
	1	1	2	3	4	4	2	1	1	1	1	1	1	1	1	1	2	2	2	2	2	2	2	2	2	1	1	1	1	1	1	1	1	1	1	1	1	1	1	1
	1	1	1	3	3	2	3	3	3	3	3	3	3	1	1	1	1	1	1
	1	1	1	2	4	3	1	1	1	1	1	1	1	1	1	1	1	1	1	1	1	1	1	2	3	3	3	3	3	2	2	2	2	2	1	1	1
	1	1	1	2	2	2	1	2	2	2	2	2	2	2	2	2	1	1	1	1	1	1	1	2	2	2	2	2	2	2	1	3	2	1	1	1
	1	2	2	5	4	4	4	5	5	3	1	1	1	1	1	2	2	2	2	2	2	2	2	2	2	2	2	2	2	2	2	2
	1	3	2	1	1	1	1	1	1	1	3	3	3	2	2	2	2	2	2	2	2	3	3	2	2	2	1	1
		1	1	1	1	2	1	2	2	2	2	2	2	3	3	3	3	4	4	3	5	4	4	2
	1	1	1	1	1	1	1	1	1	2	1	1	1	1	1	3	3	2	2	2	2	1	1	1	1	1	1	1	1	1	1	1
		2	2	2	2	2	2	1	1	1	1	1	2	2	2	2	2	4	4	5	5	5	5	5	3	3	2	1	1	1	1	1	1
	1	1	1	1	1	1	1	1	1	1	1	1	1	1	1	1	1	1	1	1	1	2	2	2	2	2	2	2	2	2	2	3	2	2	1	1	1	1	1
		1	1	1	1	2	2	2	2	2	2	2	2	2	1	2	3	2	2	2	2	1	1	2	2	10	2	3	2	2	2	2	2	3	2	2	2	3	1	1
		1	1	1	1	1	1	1	1	1	1	2	3	3	2	2	2	2	2	2	2	1	1	1	1	2	2	2	3	3	2	2	2
		1	1	1	2	3	3	4	3	3	2	2	1	2	3	4	4	5	3	2	3	3	3	2	3	2	3	2
	1	1	1	1	3	2	2	2	1	1	1	1	1	1	1	1	1	1	1	1	1	1	1	1	2	2	2	2	1	1	1	1	2	3	3	3	3	3	2	2	2	1	1	1	1	1	1
		1	1	3	3	3	3	2	1	2	2	2	2	3	3	3	3	3	2	2	3	4	4	4	4	3	2	2	1	2	1	1	1	1
		1	1	2	2	2	2	3	4	3	4	3	2	2	4	4	4	4	1	1	1	1	1	1	1	1	1	1	1	1	1	1	2	2	2	2	1
	1	1	1	3	4	2	2	2	1	1	1	1	1	4	3	3	3	2	2	2	2	2	2	1	1	1	1	1	1
		1	1	1	3	2	1	1	1	1	1	2	3	3	3	2	2	2	2	2	2	1	1	1
		1	1	2	2	2	3	3	2	2	1	1	2	2	2	2	2	2	2	2	2	2	4	4	4	3	3	3	2	2	2	2	1
		1	1	1	1	1	1	1	1	1	1	1	1	2	2	2	2	2	3	3	3	3	3	3	3	2	3	3	3	3	3	3	3	4	4	4	4	3	3	2	2	1
	1	1	3	3	3	1	1	1	1	1	2	2	1	1	1	2	2	2	2	2	2	2	4	3	3	3	3	3	4	3	3	3	3	3	2	1
		1	1	1	1	2	1	3	2	3	3	3	3	3	3	3	3	3	3	3	4	3	3	3	3	3	3	3	3	3	3	2	1	1	1	1	1	1	1	1
	1	1	1	2	2	2	1	1	2	3	3	3	3	3	2	1	1	2	2	2	2	2	2	2	2	2	4	3	2	2	2	2	2	3	4	3	2	2	2	2	2	1
	1	1	2	3	4	4	2	1	1	1	1	1	1	1	1	1	2	2	2	2	2	2	2	2	2	1	1	1	1	1	1	1	1	1	1	1	1	1	1	1
		1	1	1	1	2	2	2	2	2	2	2	2	2	1	2	3	2	2	2	2	1	1	2	2	10	2	3	2	2	2	2	2	3	2	2	2	3	1	1
	1	1	1	1	3	2	2	2	1	1	1	1	1	1	1	1	1	1	1	1	1	1	1	1	2	2	2	2	1	1	1	1	2	3	3	3	3	3	2	2	2	1	1	1	1	1	1
		1	1	2	2	2	2	3	4	3	4	3	2	2	4	4	4	4	1	1	1	1	1	1	1	1	1	1	1	1	1	1	2	2	2	2	1
		1	1	1	1	1	1	1	1	1	1	2	2	2	2	2	1	1	1	1	1	1	1	2	2	2	2	2	2	1	1	1	1	2	2	1	1	1	1
	1	1.15663	1.27907	1.74419	2.16279	2.15116	2	2.25581	2.39535	2.51163	2.59302	2.69767	2.67442	2.7907	2.73256	2.88372	2.96512	2.95349	2.74419	2.78571	2.88095	2.75904	2.81707	2.7875	2.85333	3.05333	2.75342	2.63889	2.36765	2.36923	2.14062	2.09375	2.05085	2.35294	2.25532	1.95652	1.76923	2.03125	1.66667	1.65217	1.92308	1.07692	1	1	1	1	1
	0	0.0527858	0.0588331	0.111188	0.132182	0.115214	0.129188	0.161377	0.195908	0.192004	0.185948	0.186456	0.184518	0.187223	0.184505	0.187443	0.198798	0.197042	0.197235	0.21562	0.217826	0.228443	0.21473	0.208744	0.202412	0.26973	0.202515	0.200064	0.191918	0.210961	0.188808	0.172112	0.145904	0.136694	0.16228	0.155282	0.177938	0.222179	0.246041	0.223241	0.136886	0.0769231	0	0	0	0	0
	34	83	86	86	86	86	86	86	86	86	86	86	86	86	86	86	86	86	86	84	84	83	82	80	75	75	73	72	68	65	64	64	59	51	47	46	39	32	30	23	13	13	7	5	4	4	4
	KO
	10	20	30	40	50	60	70	80	90	100	110	120	130	140	150	160	170	180	190	200	210	220	230	240	250	260	270	280	290	300	310	320	330	340	350	360	370	380	390	400	410	420	430	440	450	460	470	480	490
KO 1		1	1	1	1	1	1	1	1	2	3	3	3	3	3	3	3	3	3	2	1
	1	1	1	1	1	1	1	1	1	1	1	1	1	1	1	1	1	2	2	2	1	1	1	1	1
	1	1	1	1	1	1	1	1	1	1	2	3	3	3	3	3	3	3	3	4	3	3	3	3	3	1	1	1
	1	1	1	2	2	3	3	4	3	4	4	3	5	5	4	5	5	5	5	5	3	4	4	4	3	1	1	1
		1	1	1	2	2	2	2	3	3	4	4	3	2	2	2	2	1	1
		1	1	1	2	1	6	4	3	3	3	4	2	2	3	2	2	2	2	2	2	2	1
	1	1	1	1	1	3	4	5	5	4	3	3	2	2	2	2
		1	2	5	4	2	1	1	1	2	1	1	1	2	2	2	2	2	2	1	1	2	3	3	3	4	4	6	5	3	2	1	1	1	1	1
		1	1	1	3	3	4	4	4	4	3	4	3	4	5	5	3	3	2	2	2	1
	1	1	1	1	1	1	1	1	1	1	1	1	1	2	2	3	3	3	3	3	3	3	2	2	2	1	1
	1	1	1	1	1	1	1	1	1	2	3	3	4	5	5	5	4	3	1	1	1	1	1	1	1	1	1	1
	1	1	1	1	1	1	1	1	2	2	2	3	3	3	3	3	2	2	2	2	2	2
	1	1	1	2	2	2	1	1	1	1	1	1	1	1	1	2	3	4	4	2	1	1	1
	1	1	1	1	2	2	2	2	2	2	2	2	1
	1	1	1	1	1	1	1	2	2	2	2	2	2	2	2	2	3	1	2	2	2	2	2	1	2	2	2	1	1	1
	1	1	1	2	3	3	3	3	3	4	4	4	4	3	2	1	1	1	1	1	1
	1	1	1	2	2	2	3	3	3	2	2	3	3	2	3	3	3	3	3	4	4	3	1	1	1	1	1	1
		1	1	1	1	1	1	1	1	2	4	4	4	4	4	4	4	4	3	4	4	2	1	1
		1	1	1	1	1	1	1	1	1	1	1	2	3	3	4	4	4	4	3	3	2	2	1	1	1	1	1	1
	1	1	1	1	1	1	1	1	2	2	2	2	2	2	2	2	2	1	1	1	1	1	1	1	1	1	1	1
	1	1	1	1	1	1	1	1	1	2	2	2	3	3	3	3	3	3	3	3	3	3	3	1	1	1
KO3	1	2	2	2	2	2	1	1	1	1	2	2	1	1
		1	1	1	2	2	1	2	2	1	2	2	5	1	1	1
		1	3	5	5	4	2	2	1	1	1	1	1	1	1	1	1	1	1	1	1	1	1	1	1	1	1	2	2	2	2	2	1	1
		2	3	3	4	2	2	1	1	2	2	2	2	2	2	2	2	2	2	2	2	2	2	2	2	2	2	2	2	2	2	1	1	1
		1	1	2	2	2	2	2	2	2	2	1	1	1	1	1	1	1	1	1	1	1	1	2	1	1	1
		1	1	2	2	2	1	1	1	1	2	1	3	3	3	2	2	1	1	1
		1	1	1	1	1	1	1	1	1	2	2	2	2	3	4	4	3	3	2	1
	1	1	1	1	1	1	1	1	2	2	2	2	3	3	2	2	2	2	2	2	2	1	1	1	1
		2	2	2	2	2	3	3	2	2	3	3	3	3	4	3	2
		1	1	1	2	2	1	2	1	1	1	1	1	1	1	1	1	1	1	1
		3	4	4	3	3	3	2	3	3	3	2	2	2	2	2	2	2	1	1	1	1	1	1	1	1	1	1	1	1	1	1
		1	1	1	1	1	2	1	2	2	3	1	1	1	1	1	1	1	3	2	3	2	4	1	2	1	1	1	1	1	1
		1	1	1	2	2	2	1	2	1	1	1	1	1	1	1	2	2	2	2	2	2	2	1	1	1	1	1	1	1	1	1
		1	1	1	3	2	3	3	2	3	2	2	2	2	1	1	1	1	1	1	1	1	1	1
		1	1	1	1	1	2	2	2	2	2	2	2	2	2	2	2	1	1	1	1	1	2	2	2	2	2	2	2	2	2	1	1	1	1
	1	1	1	1	1	2	3	4	3	2	1	2	2	2	2	2	2	2	1	1	1	1	1	1	1
		1	2	2	2	1	1	1	1	1	2	1	1	1	1	1	1	1	1	1	1	1	1	1	1	1	1	1	1	1	1	2	2	2	3	3	3	2	1	1	1	1	1	1
		1	1	1	1	1	1	2	2	1	1	1	1	1	1	2	3	3	3	2	1	1	1	1	1	1	1	1
	1	1	1	1	1	1	1	1	1	1	1	1	1	2	2	2	2	2	3	3	3	3	3	3	3	2	3	3	3	3	2	2	2	1	1	1	1	2	2	1
		2	2	2	1	1	1	1	1	1	2	3	3	3	2	1	1	1	1	2	2	2	2	2	2	2	2	2	2	2	1	1	1	1	1	1	1	1	1	1
		1	1	1	1	1	1	1	2	2	4	3	2	2	2	2	2	2	2	2	1	3	3	3	3	2	1	1
		1	1	1	1	1	1	1	1	1	1	1	1	1	1	2	2	2	2	2	2	2	2	2	2	1
	1	1	1	3	3	2	2	3	3	3	1	1	1	1	1	1	1	1	1	1	2	2	2	2	2	2	2	2	2	2	2	2	2	2	1	1	1
		1	2	2	1	1	1	1	1	1	1	2	3	3	3	3	3	3	2	2	2	2	2	2	2	3	3	1
		1	1	1	1	1	1	1	1	1	1	1	1	1	2	2	1	2	2	3	2	2	2	2	2	2	2	1	1	1	1	1
KO2	1	2	2	2	2	2	1	1	1	1	2	2	1	1
		1	1	1	2	2	1	2	2	1	2	2	5	1	1	1
		1	3	5	5	4	2	2	1	1	1	1	1	1	1	1	1	1	1	1	1	1	1	1	1	1	1	2	2	2	2	2	1	1
		2	3	3	4	2	2	1	1	2	2	2	2	2	2	2	2	2	2	2	2	2	2	2	2	2	2	2	2	2	2	1	1	1
		1	1	2	2	2	2	2	2	2	2	1	1	1	1	1	1	1	1	1	1	1	1	2	1	1	1
		1	1	2	2	2	1	1	1	1	2	1	3	3	3	2	2	1	1	1
		1	1	1	1	1	1	1	1	1	2	2	2	2	3	4	4	3	3	2	1
	1	1	1	1	1	1	1	1	2	2	2	2	3	3	2	2	2	2	2	2	2	1	1	1	1
		2	2	2	2	2	3	3	2	2	3	3	3	3	4	3	2
		1	1	1	2	2	1	2	1	1	1	1	1	1	1	1	1	1	1	1
		3	4	4	3	3	3	2	3	3	3	2	2	2	2	2	2	2	1	1	1	1	1	1	1	1	1	1	1	1	1	1
		1	1	1	1	1	2	1	2	2	3	1	1	1	1	1	1	1	3	2	3	2	4	1	2	1	1	1	1	1	1
		1	1	1	2	2	2	1	2	1	1	1	1	1	1	1	2	2	2	2	2	2	2	1	1	1	1	1	1	1	1	1
		1	1	1	3	2	3	3	2	3	2	2	2	2	1	1	1	1	1	1	1	1	1	1
		1	1	1	1	1	2	2	2	2	2	2	2	2	2	2	2	1	1	1	1	1	2	2	2	2	2	2	2	2	2	1	1	1	1
	1	1	1	1	1	2	3	4	3	2	1	2	2	2	2	2	2	2	1	1	1	1	1	1	1
		1	2	2	2	1	1	1	1	1	2	1	1	1	1	1	1	1	1	1	1	1	1	1	1	1	1	1	1	1	1	2	2	2	3	3	3	2	1	1	1	1	1	1
		1	1	1	1	1	1	2	2	1	1	1	1	1	1	2	3	3	3	2	1	1	1	1	1	1	1	1
	1	1	1	1	1	1	1	1	1	1	1	1	1	2	2	2	2	2	3	3	3	3	3	3	3	2	3	3	3	3	2	2	2	1	1	1	1	2	2	1
		2	2	2	1	1	1	1	1	1	2	3	3	3	2	1	1	1	1	2	2	2	2	2	2	2	2	2	2	2	1	1	1	1	1	1	1	1	1	1
		1	1	1	1	1	1	1	2	2	4	3	2	2	2	2	2	2	2	2	1	3	3	3	3	2	1	1
		1	1	1	1	1	1	1	1	1	1	1	1	1	1	2	2	2	2	2	2	2	2	2	2	1
	1	1	1	3	3	2	2	3	3	3	1	1	1	1	1	1	1	1	1	1	2	2	2	2	2	2	2	2	2	2	2	2	2	2	1	1	1
		1	2	2	1	1	1	1	1	1	1	2	3	3	3	3	3	3	2	2	2	2	2	2	2	3	3	1
		1	1	1	1	1	1	1	1	1	1	1	1	1	2	2	1	2	2	3	2	2	2	2	2	2	2	1	1	1	1	1
	1	1.16901	1.35211	1.61972	1.77465	1.6338	1.69014	1.73239	1.74648	1.76056	1.97183	1.91549	2.04225	2	2.04412	2.07353	2.07692	1.96825	1.92063	1.87097	1.75862	1.75926	1.80769	1.64	1.68085	1.52381	1.5641	1.52778	1.72	1.66667	1.47826	1.38095	1.4	1.26667	1.36364	1.44444	1.5	1.66667	1.33333	1	1	1	1	1
	0	0.0530211	0.0853413	0.120972	0.119012	0.0902477	0.117984	0.120291	0.103691	0.103198	0.109823	0.111233	0.130679	0.118654	0.124719	0.127989	0.12071	0.12179	0.12038	0.116088	0.110847	0.105526	0.122931	0.109768	0.105826	0.109046	0.126165	0.161767	0.187261	0.143288	0.1065	0.108588	0.130931	0.118187	0.243935	0.293972	0.327327	0.210819	0.210819	0	0	0	0	0
	24	71	71	71	71	71	71	71	71	71	71	71	71	70	68	68	65	63	63	62	58	54	52	50	47	42	39	36	25	24	23	21	15	15	11	9	8	6	6	6	2	2	2	2
[truncated: 11 more columns]

## Sheet: scholl CA1 basal
	10	20	30	40	50	60	70	80	90	100	110	120	130	140	150	160	170	180	190	200	210	220	230	240	250	260	270	280	290	300	310	320	330	340	350	360	370	380	390	400	410	420	430	440	450	460	470	480	490
	WT
WT 8		3	5	5	8	10	9	10	11	10	4	3	1
		5	7	10	13	11	11	12	9	7	4	1
	2	5	6	8	10	10	11	10	7	4	2
		2	4	7	6	7	8	7	9	6	5	1	1
		5	7	9	11	8	10	8	1
	1	4	7	6	7	7	7	9	9	8	5	5	3
		2	9	12	13	10	13	15	10	6	3	2	1	1
			8	9	11	13	13	12	10	10	6	7	4	3	3	1
		3	6	10	12	12	13	11	9	4	1
		7	9	12	15	18	20	20	19	20	16	8	7	5	3	3	1
		4	9	10	10	9	9	8	6	2	1
		6	11	17	18	20	24	24	20	12	10	5	2	1
		7	10	9	13	19	16	11	8	6	7	5	1	1	1
		3	5	6	8	8	8	8	7	4	1
		10	15	14	11	10	7	2	2	1
		4	5	9	11	12	12	12	8	6	4	3	2	2
WT4	2	4	8	7	6	6	6	4	3	2	2
	1	10	11	10	8	8	4	3	3	3	1	1
		11	14	17	13	12	8	5	2	2	3	1	1
	2	10	15	11	8	8	3	3	2	1
	3	9	10	9	6	2	2	2	2	1	1	1	1
		7	10	11	9	9	6	4	2	2	1
	1	7	13	12	11	9	8	5	2	2	2	1	1
	1	13	12	12	11	8	4	2
		8	13	14	10	8	5	2	1
	3	8	9	6	3	3	2	1	1
	2	9	15	17	16	8	5	2
	2	8	7	8	7	6	5	1
	2	11	12	12	13	11	8	2	1
	2	8	10	9	7	2
		5	10	8	5	3	2
	4	6	9	11	12	10	6	3	1	1	1	1	1
		9	9	11	11	7	7	4	2	1	1	1	1
		7	10	11	9	9	6	4	2	2	1
	1	7	13	12	11	9	8	5	2	2	2	1	1
	1	10	11	10	8	8	4	3	3	3	1	1
		11	14	17	13	12	8	5	2	2	3	1	1
		9	9	11	11	7	7	4	2	1	1	1	1
	2	11	12	12	13	11	8	2	1
		8	13	14	10	8	5	2	1
WT5	2	4	8	7	6	6	6	4	3	2	2
	1	10	11	10	8	8	4	3	3	3	1	1
		11	14	17	13	12	8	5	2	2	3	1	1
	2	10	15	11	8	8	3	3	2	1
	3	9	10	9	6	2	2	2	2	1	1	1	1
		7	10	11	9	9	6	4	2	2	1
	1	7	13	12	11	9	8	5	2	2	2	1	1
	1	13	12	12	11	8	4	2
		8	13	14	10	8	5	2	1
	3	8	9	6	3	3	2	1	1
	2	9	15	17	16	8	5	2
	2	8	7	8	7	6	5	1
	2	11	12	12	13	11	8	2	1
	2	8	10	9	7	2
		5	10	8	5	3	2
	4	6	9	11	12	10	6	3	1	1	1	1	1
		9	9	11	11	7	7	4	2	1	1	1	1
		7	10	11	9	9	6	4	2	2	1
	1	7	13	12	11	9	8	5	2	2	2	1	1
	1	10	11	10	8	8	4	3	3	3	1	1
		11	14	17	13	12	8	5	2	2	3	1	1
		9	9	11	11	7	7	4	2	1	1	1	1
	2	11	12	12	13	11	8	2	1
		8	13	14	10	8	5	2	1
	1.90625	7.65079	10.3281	10.8906	9.98438	8.625	7.17742	5.25	3.98148	3.62791	2.725	2	1.52	2.16667	2.33333	2	1
	0.151334	0.337272	0.350067	0.378041	0.384143	0.446825	0.51653	0.591668	0.580062	0.57159	0.462695	0.358797	0.271539	0.654047	0.666667	1	#DIV/0!
	32	63	64	64	64	64	62	60	54	43	40	30	25	6	3	2	1
	KO
KO 1	10	20	30	40	50	60	70	80	90	100	110	120	130	140	150	160	170	180	190	200	210	220	230	240	250	260	270	280	290	300	310	320	330	340	350	360	370	380	390	400	410	420	430	440	450	460	470	480	490
	4	6	7	3	2	2	2
	4	8	9	5	2	2	1
	2	7	8	9	8	2	2	2
	4	5	8	7	4	4	2
		4	5	8	6	6	4	2
		6	7	8	9	7	5	5	2	2
	1	5	5	6	5	7	4
		3	4	6	6	6	3	2
	1	6	9	12	8	2	1	1
	1	7	8	7	3	2	2	1	1
	1	8	9	8	5	2	2	2	2	1	1
		6	7	5	5	2	1	2	1	1	1	1
	2	6	7	7	6	3	2
	1	5	6	6	6	2	1	1
	5	8	9	4	1
	1	5	6	6	6	7	3	3	1
	2	7	6	5	4	1
	3	6	5	2
	1	5	5	2	1
KO3	1	5	6	5	6	4	3
	2	8	11	9	8
	3	6	9	7	5	3	3
		6	6	9	8	7	5	4	1	1
		3	5	5	7	4	4	2
	2	9	10	11	8	6	2
	2	5	9	14	12	8	4	4	1
	2	8	10	11	9	5	4
	1	8	8	6	4	2	2	1	1	1	1
	1	8	8	8	4	3	2	1	1
	3	8	9	6	5	1	1
	4	7	7	5	3
	2	7	9	9	8	4	2	2	1	1	1
	1	4	10	11	11	10	8	4	2
	2	6	8	6	4	1
	1	5	9	11	9	5	4	2	2	1
		6	10	9	6	3
KO2	1	5	6	5	6	4	3
	2	8	11	9	8
	3	6	9	7	5	3	3
		6	6	9	8	7	5	4	1	1
		3	5	5	7	4	4	2
	2	9	10	11	8	6	2
	2	5	9	14	12	8	4	4	1
	2	8	10	11	9	5	4
	1	8	8	6	4	2	2	1	1	1	1
	1	8	8	8	4	3	2	1	1
	3	8	9	6	5	1	1
	4	7	7	5	3
	2	7	9	9	8	4	2	2	1	1	1
	1	4	10	11	11	10	8	4	2
	2	6	8	6	4	1
	1	5	9	11	9	5	4	2	2	1
		6	10	9	6	3
	2.02326	6.24528	7.88679	7.54717	6.17308	4.1087	3	2.34615	1.31579	1.09091	1	1
	0.168007	0.211953	0.246397	0.379601	0.366098	0.354717	0.258985	0.241421	0.109561	0.0909091	0	#DIV/0!
	43	53	53	53	52	46	41	26	19	11	6	1
[truncated: 1 more columns]

## Sheet: results
	APICAL			BASAL				APICAL			BASAL
dendrite	WT	KO		WT	KO		Branching	WT	KO		WT	KO
length	1690.65	453.255		1031.79	301.315		points	3.97297	2		6.5833	3.71429
	1637.58	307.653		1118.7	397.473			4.09375	1.12		8.1818	4.42857
	2185.13	649.469		930.875	485.977			5.5	2.07143		6.8182	5
	1491.1	1046.94		731.103	392.811			3.52778	3.25		5.25	4.85714
	1674.15	468.572		800.224	442.559			3.38095	2.11111		7.375	5
	1398.36	698.807		982.397	565.369			2.72093	2.31818		6	5.66667
	1614.93	464.201		1499.78	383.231			3.75	2.5		7.4615	4.71429
	867.382	1011.7		1236.27	347.869			3.36364	2.17143		7.8571	4.28571
	1666.76	688.282		1376.71	450.083			3.91429	2.95238		8.1	5
	1618.1	541.513		959.851	352.432			4.42857	1.7037		11.4375	3.55556
	1330.48	585.845		1946.8	478.459			3.46875	1.89286		6.8	3.72727
	1353.68	456.943		837.288	389.064			3.46341	1.86364		13.0769	2.90909
	1654.96	444.484		1841.85	393.775			3.73684	1.56522		8.1429	4.71429
	1662.11	253.458		1399.49	366.374			3.45455	1.61538		5.8	3.5
	1657.57	566.305		769.926	315.828			2.80645	1.63333		8	5.4
	892.624	560.184		913.342	459.995			3.54286	2.2381		6.9231	4.22222
	1100.08	715.284		1132.47	236.864			6	2.21429			4.16667
	1475.72	628.484			169.085			5.24242	2.47826		4.5455	4
	2471.49	559.494			137.113			2.89655	1.82143		5.25	2.8
	2075.21	394.277						4.66667	1.32143		7.4167
	1039.82	557.818		672.525	343.505			5.78947	1.96154		6.3	4.28571
	1541.86			786.689	416.422			3.31818			3.7692	7.6
	1354.97			1083.9	405.165			3.34783	1.5		6.1	5.14286
	1039.02			739.156	567.958			3.90909	1.66667		5.6923	5.22222
	930.745			629.195	351.618				1.60606		7.875	4.28571
	1576.2			722.595	542.136			1.34211	1.9697		7.625	6.85714
				900.99	682.738			1.65385	1.34615		4	6.55556
	684.743	257.955		874.862	564.934			2.09524	1.63158		9.25	7
	533.264	338.683		825.421	414.484			1.475	1.85		5.5	3.18182
	1096.41	653.088		452.734	396.303			2	1.6		8	4
	690.083	506.839		890.665	276.698			1.59459	2.5625		6.3333	4.71429
	754.013	437.986		524.177	545.648			1.61111	1.15789		5.5	5.2
	779.175	387.8		822.213	714.96			2.3125	1.90323		5.0769	4.18182
	982.747	395.227		455.255	314.254			1.85714	1.5		5.3333	6.77778
	628.876	464.395		384.505	566.74			2.47826	1.35484		6.1	4.5
	771.086	276.954		1487.88				1.28125	1.6087		5.6923	4.9
	584.564	752.315		841.694				2.3125	1.58824		5.25	6.8
	871.064	613.472						1.35897	1.64		7.4167
	622.37	497.344		1487.88	567.958			2.07692	1.32558		5.3333	4.28571
	1005.79	448.434		672.525	343.505			1.6875	1.37037		8	7.6
	686.008	608.09		524.177	545.648			2.59259	1.825		7.625	5.14286
	841.931	464.092		384.505	566.74			1.48936	1.5641			5.22222
	799.829	662.879		629.195	351.618			2.33333	1.88889		4.5455	4.28571
	1034.49	433.706		455.255	314.254			1.94444	1.4		5.25	6.85714
	1069.49	821.569		825.421	414.484			1.7931	1.7027		7.4167	6.55556
	674.77	692.258		452.734	396.303			1.69565	1.96296		6.3	7
	503.549	614.506		722.595	542.136			2.1875	1.41935		3.7692	3.18182
	882.406	802.437		900.99	682.738			2.26829			6.1	4
	1066.83	637.716		822.213	714.96			2.16667	1.5		5.6923	4.71429
	897.39	501.232		1083.9	405.165			2.28205	1.66667		7.875	5.2
	1081.15			841.694	276.698			2.09524	1.60606		7.625	4.18182
				874.862	564.934			1.475	1.9697		4	6.77778
	871.064	613.472		786.689	416.422			2.07692	1.34615		9.25	4.5
	882.406	802.437		739.156				1.48936	1.63158		5.5	4.9
	1096.41	653.088		890.665				1.94444	1.85		8	6.8
	684.743	257.955						1.34211	1.6		6.3333
	1034.49	433.706							2.5625		5.5
	533.264	338.683						1.34211	1.15789		5.0769
	1081.15	387.8						1.65385	1.90323		5.3333
	779.175	464.092						2.09524	1.5		6.1
	841.931	464.395						1.475	1.35484		5.6923
	628.876	637.716						2	1.6087		5.25
	1066.83	506.839						1.59459	1.58824		7.4167
	690.083	692.258						1.61111	1.64		5.3333
	674.77	608.09						2.3125	1.32558		8
	686.008	497.344						1.85714	1.37037		7.625
	622.37	821.569						2.47826	1.825
	1069.49	501.232						1.28125	1.5641
	897.39	437.986						2.3125	1.88889
	754.013	448.434						1.35897	1.4
	1005.79	662.879						2.07692	1.7027
	799.829	614.506						1.6875	1.96296
	503.549	395.227						2.59259	1.41935
	982.747	276.954						1.48936
	771.086	752.315						2.33333
	584.564							1.94444
								1.7931
mean	1055.2	546.133		896.035	434.139			1.69565
sem	49.4789	20.5531		48.1508	18.7734			2.1875
n	74	67		51	49			2.26829
								2.16667
p	6.02158e-16			4.75176e-14				2.28205
								2.09524
								1.475
								2.07692
								1.48936
								1.94444
								1.34211
							mean	2.45258	1.75624		6.59025	4.98248
							sem	0.116955	0.0479198		0.210216	0.170036
							n	86	71		64	53
							p	8.84883e-07			6.47691e-08
