# Supplementary material for: CD40 is a major regulator of dendrite growth from developing excitatory and inhibitory neurons
Source: eLife. 2017 Nov 7;6:e30442. doi: 10.7554/eLife.30442 (PMC5687868; doi:10.7554/eLife.30442)
Supplement: Figure 1—source data 2. [file elife-30442-fig1-data2.xlsx]

## Sheet: sholl
	KO																																	KO
10	13	10	7	11	13	8	9	9	11	13	7	9	11	9	14	9	11	12	14	15	11	11	10	11	13	11	14	10	7	4		2	6	3	6	9	7	6	9	4	7	7	18	7	14	9	10	9	11
20	19	20	12	21	16	16	14	15	15	21	18	12	22	15	13	21	15	16	22	18	18	15	16	21	22	12	19	12	21	16		20	16	18	17	19	23	9	9	12	12	14	25	14	20	16	15	16	20
30	24	21	17	25	16	15	12	15	19	24	24	16	28	23	13	18	20	24	25	19	16	20	22	25	20	21	24	12	29	29		25	25	22	15	29	16	14	14	17	17	20	19	18	19	23	18	16	30
40	24	23	13	22	19	17	14	14	24	30	18	15	26	17	12	16	18	20	24	19	19	20	17	33	32	24	22	13	33	29		19	22	22	16	27	14	18	17	17	15	19	17	21	22	23	17	19	28
50	18	20	12	19	16	18	11	16	21	27	16	16	29	19	15	12	18	21	16	16	19	20	19	35	29	25	20	12	30	23		22	27	25	19	29	16	20	17	20	18	18	19	26	23	23	17	24	23
60	10	17	9	18	11	17	10	18	15	23	14	10	33	15	11	9	17	15	15	14	17	19	20	36	26	24	10	12	25	19		19	27	26	19	24	14	18	14	17	16	13	22	25	20	25	17	26	24
70	8	21	9	14	11	11	6	13	12	17	7	5	29	13	11	8	11	11	14	9	16	15	21	34	21	21	6	13	20	13		18	15	28	18	20	13	15	11	15	12	7	18	22	16	23	13	23	21
80	6	16	8	12	10	6	4	6	11	13	3		26	5	10	6	8	6	8	7	12	9	17	21	17	23	5	8	18	13		14	10	22	11	16	14	12	6	15	9	6	17	16	13	19	11	22	20
90	5	13	7	5	8	5	3	6	7	6	4		15	1	9	6	7	4	6	6	7	6	15	24	14	15	5	9	12	12		12	13	19	6	15	11	12	3	10	5	5	13	11	9	12	8	22	17
100	1	10	4	2	7	3	1	4	3	5	1		8	1	4	6	5	3	12	4	3	5	14	15	7	10	3	15	6	10		10	12	12	4	12	9	11	1	10	3	4	9	13	9	9	2	21	14
110		6	4		7	3	1	2	2	4	2		5	2	1	6	3	2	5	3	1	4	9	12	4	7	2	6	5	7		4	7	11	3	9	8	7		4	2	1	5	7	7	5	2	17	18
120		5	2		8	1		5	3	3	2		5	2	1	4	3	1	5	1	1	2	6	7	3	4	1	3	3	5		4	5	10	2	8	6	5		2	2	2	2	1	8	3		16	11
130		2	1		6				1	2	1		4	2			3		1	1	1		2	6	1	4	1	2	1	4		2	4	9	2	10	4	2		2		1	1	1	4	3		14	6
140		2	1		2					1			4	1			1		1				2	4	1	2	1	1		4		1	3	5	2	10	2	1		2		1		1	2	3		5	3
150		2	2		2					1			2				1		1					2	1	1	1			1			6	4	2	9	1	1		2				1	1	2		3	1
160		1			1					1			1				1		1						1		1			1			4	4	2	5				1				1	1	2		3	1
170		1			1					1			1				1		3						1					1			2	3	2	2				1				1	1	1		3
180		1			1					1			1				1		3						1					1			2	2	1	1				1				2	1			1
190					1					1			1				1		3						1					1			1	2										2
200					1												1		3						2								1	1										1
210					1												1								2								1	1										1
220					1												1								1								1	1
230					2												1																2	1
240					2
250					1
260					1
270
280
290
300
310
320
330
340
350
	WT																																														WT
10	8	7	2	6	9	9	7	9	5	9	6	8	10	6	9	8	8	3	9	9	7	8	8	6	9	8	14	10	6	8		9	9	8	6	7	9	9	7	5	4	6	6	9	4	6	10	5	5
20	11	11	12	16	12	11	17	17	10	13	7	12	16	7	10	18	11	8	14	17	17	15	13	13	12	15	17	11	7	15		15	11	13	10	17	11	12	9	12	20	12	17	13	19	16	15	8	15
30	17	11	16	18	15	12	20	22	17	16	11	15	16	11	15	12	21	11	15	18	14	19	10	14	10	20	16	8	11	19		16	17	16	16	16	13	10	17	14	17	10	17	13	16	16	15	10	12
40	21	10	15	19	13	11	16	20	14	12	10	15	15	11	14	11	16	17	15	18	19	16	17	13	11	19	15	10	10	16		17	22	14	18	15	14	10	14	18	13	8	16	13	12	18	12	7	15
50	18	10	13	14	10	11	17	19	15	8	8	11	18	15	14	15	16	14	18	18	13	16	13	11	8	16	13	10	8	16		16	19	10	16	14	11	7	12	14	12	7	17	13	10	15	8	6	15
60	18	10	11	12	9	9	15	16	15	6	6	10	21	15	12	9	15	17	22	12	11	14	14	12	6	11	10	8	6	14		10	18	5	13	13	8	5	9	13	13	5	19	10	8	14	6	4	8
70	13	6	9	12	7	6	13	17	10	3	4	6	21	18	8	6	15	11	19	11	6	12	8	9	6	8	2	9	4	12		5	16	4	12	10	9	3	7	8	11	6	9	10	8	12	4	6	7
80	9	8	10	11	4	7	9	14	9	2	2	5	22	18	6	5	15	11	17	8	6	11	9	6	5	8	1	8	2	11		3	12	3	11	9	7	1	6	8	8	3	9	9	4	8	3	6	7
90	8	5	7	7	3	6	5	10	6		1	4	14	17	7	5	10	10	15	5	3	10	4	6	2	5	1	8	1	10		1	10	3	6	8	4	2	4	5	4	1	8	7	3	3	3	5	7
100	6	4	7	7	2	6	4	9	2			3	15	12	4	6	7	9	15	3	3	9	2	3	1	2	1	1		9			9	1	4	6		2	4	6	1	1	3	8	1	1	1	3	5
110	7	2	5	4		6	3	6				2	14	11	2	4	5	9	14	2	1	6	1		1		6	1		6			6	1	3	4		2	2	3	1	1	2	3	1	1	1	3	5
120	4	2	6	4		5	3	4				2	9	7	1	2	3	6	11	2	1	6			1					6			3			2		2	1	2	1	2	1	2	1		1	3	2
130	3	2	4	2		4	1	3				1	6	2	1	2	3	7	12	1	1	7			1					7			3			2		1	2	2		2		2				2	1
140	1	1	2			2						1	4	1	1	2	3	4	9	1	2	7			1					7			2						1	3		1		2				1	1
150	1	1	2			2						1	1		1	2	3	1	5	1	1	7			2					7			1						1	1		3		2				1	1
160	1		2			1						1			1	2	2	1	5		1	5			2					5										1		1		2
170	1		2			1						1			1	2	2		3		1	5			2					5										2
180	1					1									1	2	2		2			5			2					5										2
190	1					1										2	1		1			3			1					3										1
200	1					1											1		1			1			1					1
210	1					1											1		1			1								1
220	1					1											1		1			1								1
230	1					1											1					1								1
240	1					1											1					1								1
250	1																					1								1
260	1
270	1
280	1
290
300
310
320
330
340
350
[truncated: 44 more columns]

## Sheet: results
Total length	WT	KO		primary	WT	KO		branching	WT	KO	mean neurite	WT	KO
n=1	2029.97	1713.7		dendrites	9	13		points	3.77778	4.53846	length	225.552	131.823
	1037.54	2504.32			9	10			2	4.6		115.282	250.432
	1514	1414.96			7	7			3.28571	4.57143		216.286	202.137
	1760	1813.41			8	13			3.625	2.84615		220	139.493
	1016.24	1999.76			9	12			2.44444	3.16667		112.916	166.647
	1463.74	1436.72			9	6			2.77778	6		162.638	239.453
	1731.65	1059.48			10	5			3.3	5.2		173.165	211.896
	1938.31	1573.96			8	7			4.75	4.85714		242.288	224.851
	1274.93	1835.63			6	11			4.33333	3.90909		212.488	166.876
	808.687	2354.66			9				2.66667	3.11111		89.8541	130.815
	697.579	1489.46			6	8			2.33333	4.125		116.263	186.182
	1219.51	1113.96			8	6			2.75	4.83333		152.439	185.66
	2620.58	3347.2			9	7			4.33333	9		291.176	478.172
	1892.07	1688.97			6	7			5.5	6		315.345	241.282
	1312.85	1401.87			9	11			3.33333	2.72727		145.872	127.443
	1455.07	1514.9			10	8			3.1	4		145.507	189.362
	2150.7	1847.27			7	11			4.71429	2.81818		307.243	167.933
	1738.75	1886.39			6	11			5	3.45455		289.792	171.49
	2712.67	2269.5			9				4.22222	3		301.408	133.5
	1595.5	1785.77			7	11			4.42857	4		227.928	162.343
	1360.3	1898.75			8	10			4.5	3.9		170.038	189.875
	2383.25	1891.34			10	11			3.5	3.09091		238.325	171.94
	1163.28	2462.08			9	8			3.66667	4.875		129.254	307.76
	1264.57	3873.71			9	13			3.66667	5.30769		140.507	297.978
	1047.25	2839.65			10				2.5	4.23529		104.725	167.038
	1558.4	2811.51			9	9			4.11111	5.44444		173.155	312.39
	1111.94	1705.44			12	14			3.08333	3		92.6615	121.817
	1013.33	1649.95			8	8			3.5	3.625		126.667	206.243
	697.579	3086.83			6				2.33333	4.47059		116.263	181.578
	2383.25	2498.39			10	9			3.5	5.55556		238.325	277.599
n=2	1186.98	2330.24			9	13			4.33333	3.38462		131.887	179.249
	2088.97	2747.6			7	12			4.71429	4.75		298.424	228.967
	980.005	3365.95			8	10			2.875	6.1		122.501	336.595
	1448	1812.4			7	7			4.42857	5.42857		206.857	258.914
	1584.82	3127.62			10	8			3.9	6.625		158.482	390.953
	1060.21	1929.96			9	9			2.77778	3.44444		117.802	214.441
	951.014	1888.33			9	7			2.88889	3.85714		105.668	269.761
	1195.54	1309.68			7	8			3.42857	4		170.792	163.709
	1549.22	2037.44			5	9			6.2	4		309.844	226.382
	1345.64	1695.59			9	8			3.66667	4.25		149.515	211.949
	910.808	1655.32			7	8			2.71429	4.875		130.115	206.915
	1680.6	2154.68			11	11			3	4.09091		152.782	195.88
	1608.78	2640.1			8	6			4.125	7.5		201.097	440.016
	1162.96	2348.92			8	8			3.375	5.375		145.37	293.615
	1511.62	2561.9			14	9			2.71429	4.77778		107.973	284.656
	909.56	1728.31			8	8			2.625	4.375		113.695	216.039
	1107.43	3755.19			6	7			3.66667	7.57143		184.572	536.456
	1464.99	3119.44			8	8			3.25	6		183.124	389.931
	1143.46	2524.65			8	9			3.25	4.55556		142.932	280.517
	732.775	1760.14			8	6			2	6.16667		91.5968	293.357
	757.715	3755.79			8	5			2	14		94.7144	751.158
	1953.59	2905.73			8	9			4.5	5.66667		244.199	322.858
	1607.19	2808.1			10	8			2.1	7.375		160.719	351.012
	1077.51	2501.79			7	6			3.42857	6		153.93	416.965
	1381.94	2370.47			10	6			2.3	7.5		138.194	395.078
	1111.69	3389.76			14	11			1.78571	6.54545		79.4066	308.16
	661.235	2871.58			8	10			2.25	6.5		82.6544	287.158
	931.46	2356.5			10	7			2.2	5.57143		93.146	336.642
	1094.78	2508.47			8	8			2.875	6.625		136.848	313.559
	2001.54	3441.05			10	7			4.4	7.14286		200.154	491.579
n=3	1053.51	2416.92			11	11			2.63636	4.36364		95.7739	219.72
	1185.29	1761.4			11	10			3.36364	3.7		107.754	176.14
	1188.42	2203.27			11	11			2.63636	4.45455		108.038	200.297
	1226.77	1839.86			8	10			3.875	4.1		153.346	183.986
	1347.81	2066.21			8	10			4.5	4.3		168.477	206.621
	879.22	1973.87			11	8			2.63636	6.25		79.9291	246.733
	2120.86	1518.36			9	8			5.11111	3.75		235.651	189.795
	904.381	2254.46			12	6			1.91667	7.66667		75.3651	375.743
	774.005	2275.69			8	12			3.75	4.91667		96.7506	189.641
	1391.55	2002.01			8	12			4.75	4		173.944	166.834
	1096.82	1425.4			9	9			3.11111	4.22222		121.869	158.378
	908.086	1300.95			6	10			4.16667	4.6		151.348	130.095
	1200.46	1212.69			8	9			3.25	4.66667		150.058	134.743
	1278.37	1115.79			6	9			3.33333	4		213.062	123.977
	851.465	2150.34			8	9			2.875	7.55556		106.433	238.927
	975.822	2175.25			8	10			3	5.7		121.978	217.525
	854.653	1713.89			6	7			2.5	5.85714		142.442	244.842
	1046.25	1706.26			9	6			2.88889	7.16667		116.25	284.376
	775.787	1404.91			12	8			1.66667	4.375		64.6489	175.614
	1294.57	1517.5			8	13			3.25	3.76923		161.822	116.731
	1255.78	1954.53			11	10			3.09091	4.9		114.162	195.453
	1012.32	1174.53			6	12			4	3.83333		168.721	97.8777
	760.966	2035.46			10	9			2.1	5.77778		76.0966	226.163
	1023.51	1604.49			10	12			3.1	2.91667		102.351	133.708
	1786.26	1551.71			12	11			3.33333	4.18182		148.855	141.064
		2002.82				10				5.6			200.282
		1872.81				11				4.36364			170.256
		1725.1				9				5			191.678
		1846.86				7				4.85714			263.836
mean	1321.75	2112.09			8.67059	9.09412			3.3606	5.00181		158.323	239.725
sem	49.4412	68.4581			0.196174	0.231076			0.0996924	0.174329		6.72226	11.2061
n	85	89			85	85			85	89		85	89
	6.87158e-17				0.164182				1.13423e-13			5.01515e-09
