# Supplementary material for: CD40 is a major regulator of dendrite growth from developing excitatory and inhibitory neurons
Source: eLife. 2017 Nov 7;6:e30442. doi: 10.7554/eLife.30442 (PMC5687868; doi:10.7554/eLife.30442)
Supplement: Figure 1—source data 3. [file elife-30442-fig1-data3.xlsx]

## Sheet: Apical dendrites Hipp
	Apical dendrites Hippocampus
	2-way ANOVA with Bonferroni posttest
	distance from the soma	Difference	t	P value	Summary
	10.00	0	0	P > 0.05	ns
	20.00	0.0124	0.05608	P > 0.05	ns
	30.00	0.073	0.3328	P > 0.05	ns
	40.00	-0.1245	0.5677	P > 0.05	ns
	50.00	-0.3882	1.77	P > 0.05	ns
	60.00	-0.5174	2.359	P > 0.05	ns
	70.00	-0.3099	1.413	P > 0.05	ns
	80.00	-0.5234	2.386	P > 0.05	ns
	90.00	-0.6488	2.958	P > 0.05	ns
	100.0	-0.751	3.424	P < 0.05	*
	110.0	-0.6212	2.832	P > 0.05	ns
	120.0	-0.7822	3.566	P < 0.05	*
	130.0	-0.6321	2.882	P > 0.05	ns
	140.0	-0.7907	3.591	P < 0.05	*
	150.0	-0.6885	3.102	P > 0.05	ns
	160.0	-0.8102	3.65	P<0.01	**
	170.0	-0.8882	3.951	P<0.01	**
	180.0	-0.9852	4.344	P<0.001	***
	190.0	-0.8236	3.631	P < 0.05	*
	200.0	-0.9147	3.994	P<0.01	**
	210.0	-1.122	4.807	P<0.001	***
	220.0	-0.9997	4.181	P<0.01	**
	230.0	-1.009	4.163	P<0.01	**
	240.0	-1.148	4.654	P<0.001	***
	250.0	-1.172	4.608	P<0.001	***
	260.0	-1.53	5.802	P<0.001	***
	270.0	-1.189	4.384	P<0.001	***
	280.0	-1.111	3.98	P<0.01	**
	290.0	-0.6476	2.024	P > 0.05	ns
	300.0	-0.7025	2.15	P > 0.05	ns
	310.0	-0.6623	1.992	P > 0.05	ns
	320.0	-0.7128	2.072	P > 0.05	ns
	330.0	-0.6508	1.645	P > 0.05	ns
	340.0	-1.086	2.704	P > 0.05	ns
	350.0	-0.8917	1.946	P > 0.05	ns
	360.0	-0.5121	1.027	P > 0.05	ns
	370.0	-0.2692	0.5071	P > 0.05	ns

## Sheet: Basal dendrites Hipp
	Basal dendrites Hippocampus
	2-way ANOVA with Bonferroni posttest
	distance from the soma	Difference	t	P value	Summary
	10.00	0.117	0.1703	P > 0.05	ns
	20.00	-1.406	2.563	P > 0.05	ns
	30.00	-2.441	4.467	P<0.001	***
	40.00	-3.343	6.118	P<0.001	***
	50.00	-3.811	6.938	P<0.001	***
	60.00	-4.516	7.94	P<0.001	***
	70.00	-4.177	7.053	P<0.001	***
	80.00	-2.904	4.203	P<0.001	***
	90.00	-2.666	3.396	P<0.01	**
	100.0	-2.537	2.552	P > 0.05	ns
	110.0	-1.725	1.339	P > 0.05	ns

## Sheet: MSN striatum
	MSN striatum
	2-way ANOVA with Bonferroni posttest
	distance from the soma	Difference	t	P value	Summary
	10.00	1.809	2.955	P > 0.05	ns
	20.00	4.12	6.729	P<0.001	***
	30.00	6.086	9.94	P<0.001	***
	40.00	7.442	12.15	P<0.001	***
	50.00	7.984	13.04	P<0.001	***
	60.00	6.91	11.29	P<0.001	***
	70.00	6.354	10.38	P<0.001	***
	80.00	4.669	7.581	P<0.001	***
	90.00	3.829	6.179	P<0.001	***
	100.0	2.303	3.58	P<0.01	**
	110.0	1.381	2.015	P > 0.05	ns
	120.0	0.8783	1.178	P > 0.05	ns
	130.0	0.3171	0.3863	P > 0.05	ns
	140.0	0.2851	0.3148	P > 0.05	ns
	150.0	0.1842	0.1813	P > 0.05	ns
	160.0	-0.1481	0.1225	P > 0.05	ns
	170.0	-0.2557	0.1927	P > 0.05	ns
	180.0	-0.7149	0.4802	P > 0.05	ns
	190.0	0	0	P > 0.05	ns
	200.0	0.375	0.1912	P > 0.05	ns
	210.0	0.1667	0.07644	P > 0.05	ns
	220.0	0	0	P > 0.05	ns
	230.0	0.5	0.1919	P > 0.05	ns
