# Supplementary material for: CD40 is a major regulator of dendrite growth from developing excitatory and inhibitory neurons
Source: eLife. 2017 Nov 7;6:e30442. doi: 10.7554/eLife.30442 (PMC5687868; doi:10.7554/eLife.30442)
Supplement: Figure 2—source data 1. [file elife-30442-fig2-data1.xlsx]

## Sheet: total dendrite length
	ctrol			sCD40			Fc			CD40-Fc
	mean	sem	n	mean	sem	n	mean	sem	n	mean	sem	n
WT	935.23	83.8988	70	492.629	64.2219	51	828.071	99.4717	55	1015.24	110.257	61
KO	573.608	57.8612	60	491.682	91.5039	57	681.247	98.5231	61	1071.61	154.721	59

## Sheet: dendrite per neuron
	ctrol			sCD40			Fc			CD40-Fc
	mean	sem	n	mean	sem	n	mean	sem	n	mean	sem	n
WT	5.45714	0.296599	70	4.26829	0.256678	51	5.2	0.355903	55	5.7619	0.33739	61
KO	4.68571	0.319589	60	4.81481	0.354206	57	5.65517	0.348381	61	5.65517	0.348381	59

## Sheet: mean dendrite length
	ctrol			sCD40			Fc			CD40-Fc
	mean	sem	n	mean	sem	n	mean	sem	n	mean	sem	n
WT	171.377	12.2047	70	115.416	11.5299	51	159.245	17.2751	55	176.199	16.2295	61
KO	122.416	8.31009	60	102.119	14.1547	57	132.465	16.6742	61	189.493	22.3762	59
