# Supplementary material for: CD40 is a major regulator of dendrite growth from developing excitatory and inhibitory neurons
Source: eLife. 2017 Nov 7;6:e30442. doi: 10.7554/eLife.30442 (PMC5687868; doi:10.7554/eLife.30442)
Supplement: Figure 3—source data 1. [file elife-30442-fig3-data1.xlsx]

## Sheet: axon length 3 DIV
	ctrol			sCD40L			Fc			CD40-Fc
	mean	sem	n	mean	sem	n	mean	sem	n	mean	sem	n
WT	297.273	14.7337	74	174.584	8.34834	68	267.516	15.4126	72	291.313	16.3816	77
KO	149.721	12.2102	61	163.221	8.89975	64	151.502	15.3169	56	247.136	18.3781	81

## Sheet: axon ramification 3 DIV
	ctrol			sCD40L			Fc			CD40-Fc
	mean	sem	n	mean	sem	n	mean	sem	n	mean	sem	n
WT	1.75676	0.158448	74	1.19118	0.103192	68	1.73611	0.149324	72	1.79221	0.157233	77
KO	1.13115	0.120281	61	1.3125	0.149196	64	1.14286	0.133457	56	1.79012	0.193023	81

## Sheet: axon length 9 DIV
	ctrol			sCD40L			Fc			CD40-Fc
	mean	sem	n	mean	sem	n	mean	sem	n	mean	sem	n
WT	3170.05	184.129	70	2016.23	163.615	51	2964.83	207.65	55	2992.43	206.66	61
KO	2269.51	195.818	60	1999.16	190.36	57	1954.9	189.679	61	3330.8	181.275	59

## Sheet: axon ramification 9 DIV
	ctrol			sCD40L			Fc			CD40-Fc
	mean	sem	n	mean	sem	n	mean	sem	n	mean	sem	n
WT	13	1.02817	70	7.41463	0.567381	51	10.56	0.995121	55	11.4286	1.19437	61
KO	9.45714	0.664012	60	7.03704	0.571103	57	8.28571	0.82561	61	13.6897	0.921959	59
