# Supplementary material for: CD40 is a major regulator of dendrite growth from developing excitatory and inhibitory neurons
Source: eLife. 2017 Nov 7;6:e30442. doi: 10.7554/eLife.30442 (PMC5687868; doi:10.7554/eLife.30442)
Supplement: Figure 4—source data 1. [file elife-30442-fig4-data1.xlsx]

## Sheet: neurite length
	ctrol			sCD40			Fc			CD40-Fc
	mean	sem	n	mean	sem	n	mean	sem	n	mean	sem	n
WT	883.712	36.4818	69	1159.06	41.0015	65	930.374	38.3499	63	830.512	32.8595	62
KO	1308.61	53.9579	60	1200.65	54.9673	62	1366.02	49.4068	52	769.759	36.5329	73

## Sheet: mean neurite length
	ctrol			sCD40			Fc			CD40-Fc
	mean	sem	n	mean	sem	n	mean	sem	n	mean	sem	n
WT	129.122	6.70363	69	217.782	11.5756	65	139.252	6.50573	63	133.82	7.8618	62
KO	182.431	8.75935	60	200.63	10.4207	62	195.002	9.25364	52	128.309	7.44587	73

## Sheet: primary neurites
	ctrol			sCD40			Fc			CD40-Fc
	mean	sem	n	mean	sem	n	mean	sem	n	mean	sem	n
WT	7.41176	0.239104	68	5.78462	0.207425	65	6.93651	0.199684	63	6.74194	0.244382	62
KO	7.56667	0.248574	60	6.48387	0.258889	62	7.40385	0.280405	52	6.34247	0.213882	73

## Sheet: ramification neurites
	ctrol			sCD40			Fc			CD40-Fc
	mean	sem	n	mean	sem	n	mean	sem	n	mean	sem	n
WT	3.03108	0.125165	68	3.5397	0.14885	65	3.0529	0.0982006	63	3.0924	0.174895	62
KO	3.82437	0.168976	60	3.18413	0.178142	62	3.80525	0.163679	52	2.80713	0.124536	73
