# Supplementary material for: CD40 is a major regulator of dendrite growth from developing excitatory and inhibitory neurons
Source: eLife. 2017 Nov 7;6:e30442. doi: 10.7554/eLife.30442 (PMC5687868; doi:10.7554/eLife.30442)
Supplement: Figure 5—source data 1. [file elife-30442-fig5-data1.xlsx]

## Sheet: dendrite length
results
	Total dendrite length
	ctrol	DMSO	Go6983	Fc	CD40-Fc	CD40-Fc + Go	PMA
mean	437.844	542.554	471.969	461.437	1001.85	366.175	868.16
sem	51.584	64.034	48.39	73.1938	156.915	30.785	125.535
n	43	43	34	33	37	37	34

## Sheet: mean dendrite length
results
	mean dendrite length
	ctrol	DMSO	Go6983	Fc	CD40-Fc	CD40-Fc + Go	PMA
mean	90.0537	113.73	81.0708	85.9869	163.091	70.6607	167.165
sem	9.11207	12.5639	7.66731	11.8301	24.4001	5.28287	28.5283
n	43	43	34	33	37	37	34

## Sheet: primary dendrites
results
	No primary dendrites
	ctrol	DMSO	Go6983	Fc	CD40-Fc	CD40-Fc + Go	PMA
mean	4.90698	5.46512	6.02941	5.45455	6.13514	5.51351	5.94118
sem	0.209978	0.211384	0.325629	0.238727	0.322253	0.356454	0.324137
n	43	43	34	33	37	37	34

## Sheet: dendrite ramifications
results
	mean ramifications dendrite
	ctrol	DMSO	Go6983	Fc	CD40-Fc	CD40-Fc + Go	PMA
mean	2.04568	2.4629	2.03647	2.09827	2.96523	1.92542	2.77959
sem	0.120216	0.173248	0.106417	0.180431	0.256848	0.114718	0.256125
n	43	43	34	33	37	37	34
