# Supplementary material for: CD40 is a major regulator of dendrite growth from developing excitatory and inhibitory neurons
Source: eLife. 2017 Nov 7;6:e30442. doi: 10.7554/eLife.30442 (PMC5687868; doi:10.7554/eLife.30442)
Supplement: Figure 5—source data 2. [file elife-30442-fig5-data2.xlsx]

## Sheet: total neurite length
results
	Total neurites
	ctrol	DMSO	Go6983	Fc	CD40-Fc	CD40-Fc + Go	PMA
mean	1428.88	1403.23	1283.23	1331.38	865.723	1263.18	820.731
sem	53.2822	51.4317	42.7924	45.2865	36.636	66.6665	31.1082
n	56	46	49	50	61	48	58

## Sheet: mean neurite length
results	KO
	mean length neurite
	ctrol	DMSO	Go6983	Fc	CD40-Fc	CD40-Fc + Go	PMA
mean	254.866	253.066	225.073	253.298	174.236	242.792	143.798
sem	13.2135	10.9219	12.7247	15.3501	9.2809	15.3749	7.35378
n	56	46	49	50	61	48	58

## Sheet: primary neurites
results
	No primary neurites
	ctrol	DMSO	Go6983	Fc	CD40-Fc	CD40-Fc + Go	PMA
mean	6.05357	5.73913	6.16327	5.86	5.45902	5.6875	6.10345
sem	0.244975	0.174275	0.242834	0.263431	0.187846	0.268229	0.238073
n	56	46	49	50	61	48	58

## Sheet: neurite ramification
results
	mean ramifications neurite
	ctrol	DMSO	Go6983	Fc	CD40-Fc	CD40-Fc + Go	PMA
mean	4.71937	4.39526	3.83649	4.59677	3.58983	4.17498	2.88862
sem	0.217337	0.21319	0.205672	0.27454	0.154966	0.244489	0.111258
n	56	46	49	50	61	48	58
