# Supplementary material for: CD40 is a major regulator of dendrite growth from developing excitatory and inhibitory neurons
Source: eLife. 2017 Nov 7;6:e30442. doi: 10.7554/eLife.30442 (PMC5687868; doi:10.7554/eLife.30442)
Supplement: Figure 6—source data 1. [file elife-30442-fig6-data1.xlsx]

## Sheet: dendrite length
	dendrite length
	control siRNA	PKCb siRNA	PKCg siRNA
mean	1071.67	641.543	1047.36
sem	126.442	78.488	106.901
n	32	33	27

## Sheet: mean dendrite length
	mean dendrite length
	control siRNA	PKCb siRNA	PKCg siRNA
mean	196.589	149.691	201.295
sem	22.0688	19.782	23.2757
n	32	33	27

## Sheet: primary dendrites
	primary dendrites
	control siRNA	PKCb siRNA	PKCg siRNA
mean	5.6875	4.54545	5.74074
sem	0.334319	0.298642	0.460993
n	32	33	27

## Sheet: axon length
	axon length
	control siRNA	PKCb siRNA	PKCg siRNA
mean	4345.9	3099.94	4574.02
sem	359.058	435.659	472.073
n	32	33	27
