# Supplementary material for: CD40 is a major regulator of dendrite growth from developing excitatory and inhibitory neurons
Source: eLife. 2017 Nov 7;6:e30442. doi: 10.7554/eLife.30442 (PMC5687868; doi:10.7554/eLife.30442)
Supplement: Figure 6—source data 2. [file elife-30442-fig6-data2.xlsx]

## Sheet: neurite length
	neurite length
	control siRNA	PKCb siRNA	PKCg siRNA
mean	672.092	788.856	1243.08
sem	47.252	52.5957	136.298
n	27	26	25

## Sheet: mean neurite length
	mean neurite length
	control siRNA	PKCb siRNA	PKCg siRNA
mean	122.425	131.396	208.04
sem	8.17819	10.7323	24.179
n	27	26	25

## Sheet: primary neurites
	primary neurites
	control siRNA	PKCb siRNA	PKCg siRNA
mean	5.81481	6.5	6.48
sem	0.373774	0.373136	0.396316
n	27	26	25
