# Supplementary material for: CD40 is a major regulator of dendrite growth from developing excitatory and inhibitory neurons
Source: eLife. 2017 Nov 7;6:e30442. doi: 10.7554/eLife.30442 (PMC5687868; doi:10.7554/eLife.30442)
Supplement: Figure 6—source data 3. [file elife-30442-fig6-data3.xlsx]

## Sheet: dendrite length
	dendrite length
	control siRNA		PKCg siRNA
	Fc	CD40-Fc	Fc	CD40-Fc
mean	637.134	1141.18	549.403	443.528
sem	78.1109	108.775	50.3888	48.7673
n	39	35	39	39

## Sheet: mean dendrite length
	mean dendrite length
	control siRNA		PKCg siRNA
	Fc	CD40-Fc	Fc	CD40-Fc
mean	119.312	202.249	104.544	85.3561
sem	13.2334	21.3785	7.15769	6.92412
n	39	35	39	39

## Sheet: primary dendrites
	primary dendrites
	control siRNA		PKCg siRNA
	Fc	CD40-Fc	Fc	CD40-Fc
mean	5.41026	6.14286	5.17949	5.20513
sem	0.264187	0.373813	0.197391	0.241396
n	39	35	39	39

## Sheet: axon length
	axon length
	control siRNA		PKCg siRNA
	Fc	CD40-Fc	Fc	CD40-Fc
mean	2171.42	4418.65	2104.21	1918.98
sem	206.307	411.328	232.762	256.463
n	39	35	39	39
