# Supplementary material for: CD40 is a major regulator of dendrite growth from developing excitatory and inhibitory neurons
Source: eLife. 2017 Nov 7;6:e30442. doi: 10.7554/eLife.30442 (PMC5687868; doi:10.7554/eLife.30442)
Supplement: Figure 6—source data 4. [file elife-30442-fig6-data4.xlsx]

## Sheet: neurite length
	neurite length
	control siRNA		PKCg siRNA
	Fc	CD40-Fc	Fc	CD40-Fc
mean	1261.34	680.596	1151.94	953.057
sem	75.3902	44.6775	93.8293	57.4542
n	34	26	29	34

## Sheet: mean neurite length
	mean neurite length
	control siRNA		PKCg siRNA
	Fc	CD40-Fc	Fc	CD40-Fc
mean	199.444	121.294	212.362	173.66
sem	15.6994	10.6941	28.1554	15.7975
n	34	26	29	34

## Sheet: primary neurites
	primary neurites
	control siRNA		PKCg siRNA
	Fc	CD40-Fc	Fc	CD40-Fc
mean	6.85294	6.07692	6.44828	6.38235
sem	0.353572	0.313408	0.461808	0.432657
n	34	26	29	34
