# Supplementary figures and images for: CD40 is a major regulator of dendrite growth from developing excitatory and inhibitory neurons
Source: eLife journal article supplement (doi:10.7554/elife.30442), 2017-11-07

A Hippocampal Pyramidal Neurons

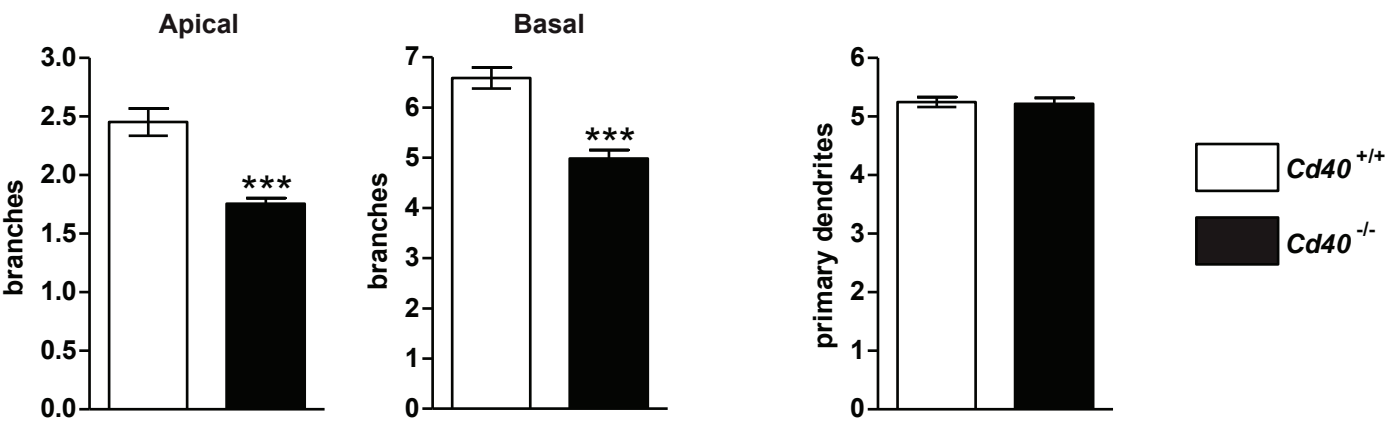

B Striatal Medium Spiny Neurons

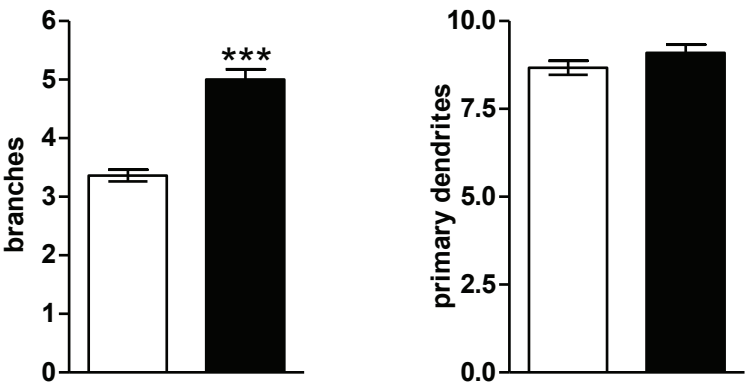

Figure 1 Supplemental Figure 1

Supplement: supp [file elife-30442-supp-v1.zip]

A Hippocampal lysates

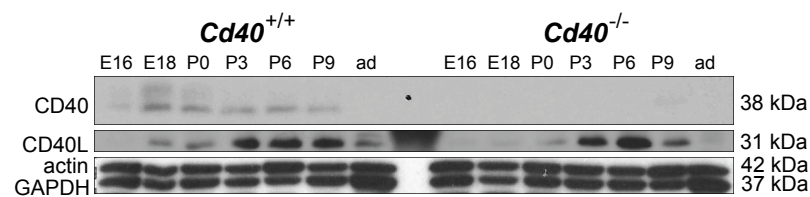

B Striatal lysates

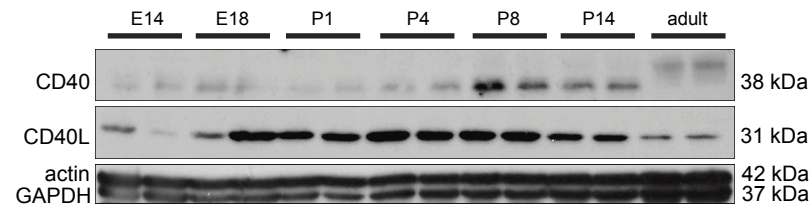

Figure 7 Supplemental Figure 1

Supplement: supp [file elife-30442-supp-v1.zip]

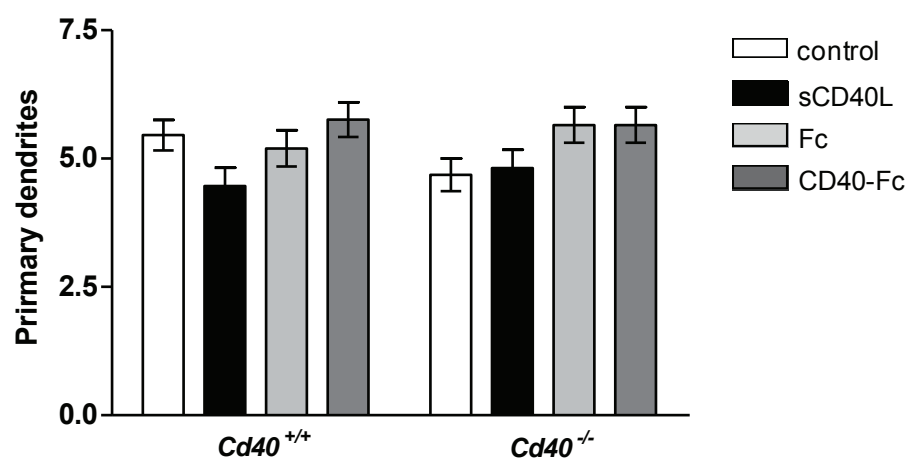

Figure 2 Supplemental Figure 1

Supplement: supp [file elife-30442-supp-v1.zip]

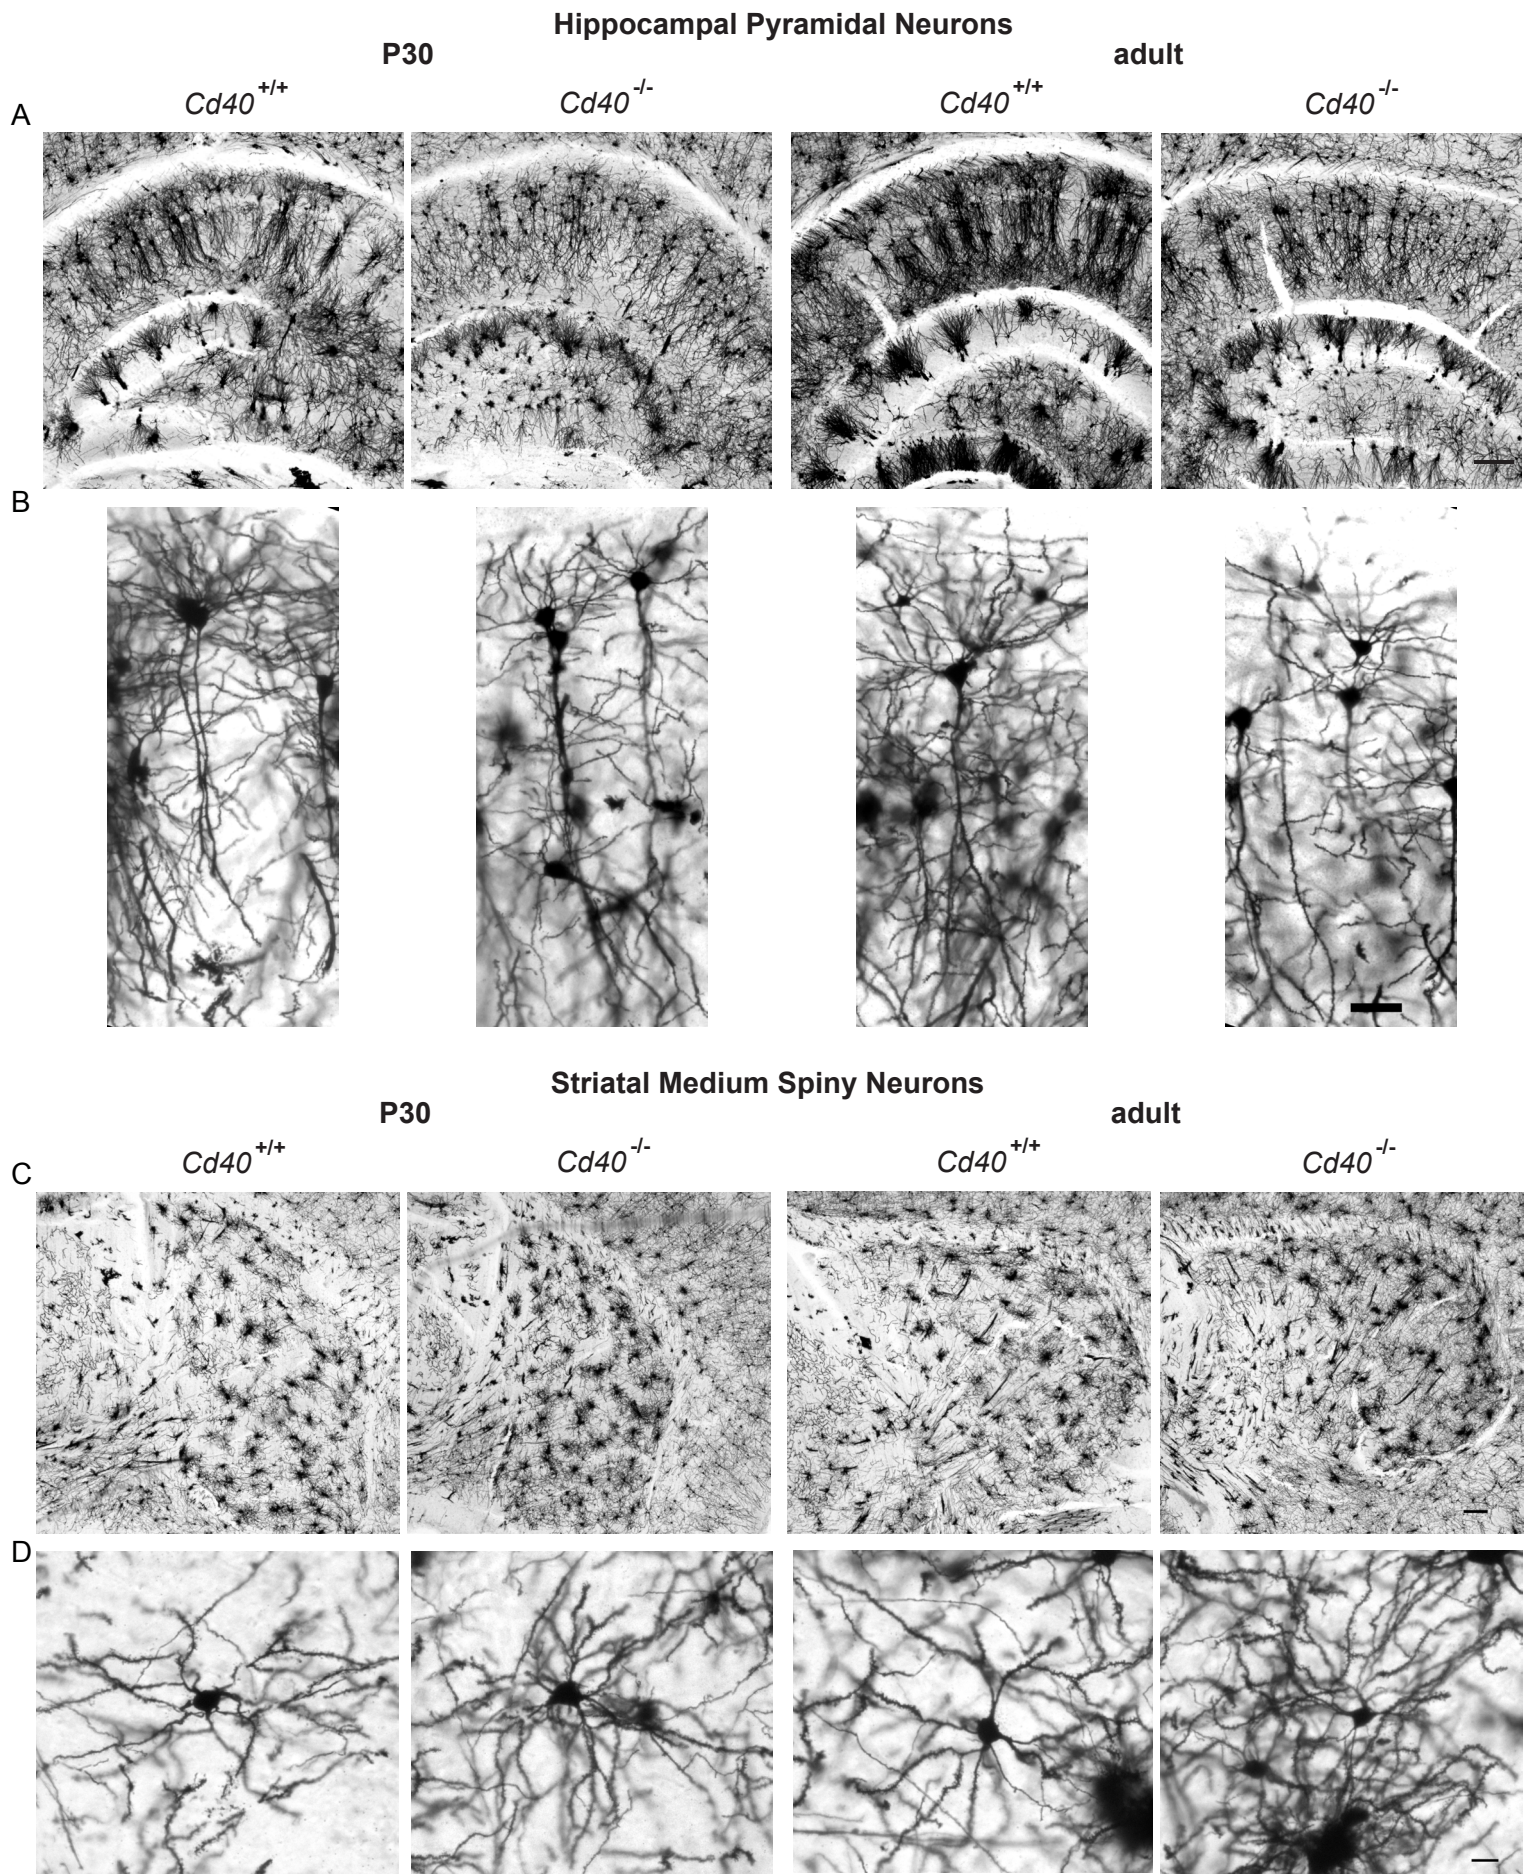

Figure 1 Supplemental Figure 2

Supplement: supp [file elife-30442-supp-v1.zip]

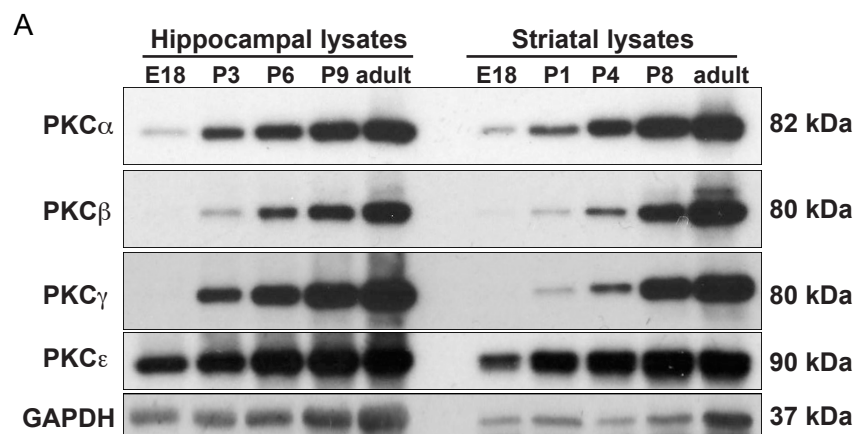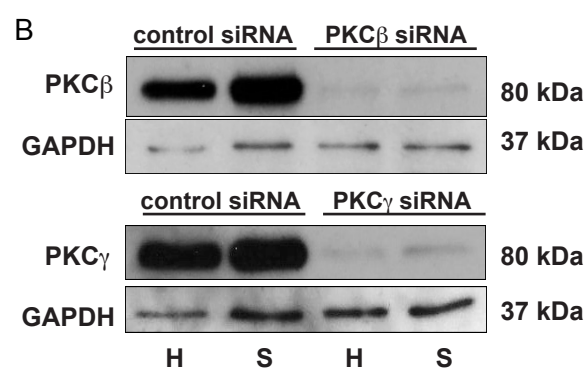

Figure 6 Supplemental 1

Supplement: supp [file elife-30442-supp-v1.zip]
